1 **Genome-wide analysis of GATA factors in moso bamboo (*Phyllostachys edulis*)**

2 **unveils that PeGATAs regulate shoot rapid-growth and rhizome development**

3 Taotao Wang<sup>1</sup>, Yong Yang<sup>1</sup>, Shuaitong Lou<sup>2</sup>, Wei Wei<sup>1</sup>, Zhixin Zhao<sup>3</sup>, Chentao Lin<sup>4</sup>,

4 Liuyin Ma<sup>2\*</sup>

5 <sup>1</sup>Basic Forestry and Proteomics Research Center, College of Forestry, Fujian

6 Provincial Key Laboratory of Haixia Applied Plant Systems Biology, Fujian

7 Agriculture and Forestry University, Fuzhou 350002, China

8 <sup>2</sup>Fujian Provincial Key Laboratory of Plant functional Biology, College of Life

9 Sciences, Fuzhou 350002, China

10 <sup>3</sup>College of Biopharmaceutical and Food Engineering, Shangluo University, Shangluo

11 726000, China

12 <sup>4</sup>Department of Molecular, Cell and Developmental Biology, University of California,

13 Los Angeles, CA 90095, USA

14 \*Corresponding author:

15 Liuyin Ma: Tel. +86 591 86392267; email: lma223@fafu.edu.cn

16

17

18 **ABSTRACT**

19 **Background**

20 Moso bamboo is well-known for its rapid-growth shoots and widespread rhizomes.

21 However, the regulatory genes of these two processes are largely unexplored.

22 GATA factors regulate many developmental processes, but its role in plant height

23 control and rhizome development remains unclear.

24 **Results**

25 Here, we found that bamboo GATA factors (PeGATAs) are involved in the

26 growth regulation of bamboo shoots and rhizomes. Bioinformatics and

27 evolutionary analysis showed that there are 31 PeGATA factors in bamboo, which

28 can be divided into three subfamilies. Light, hormone, and stress-related

29 *cis*-elements were found in the promoter region of the *PeGATA* genes. Gene

30 expression of 12 *PeGATA* genes was regulated by phytohormone-GA but there

31 was no correlation between auxin and *PeGATA* gene expression. More than 27

32 *PeGATA* genes were differentially expressed in different tissues of rhizomes, and

33 almost all *PeGATAs* have dynamic gene expression level during the rapid-growth

34 of bamboo shoots. These results indicate that *PeGATAs* regulate rhizome  
35 development and bamboo shoot growth partially via GA signaling pathway. In  
36 addition, *PeGATA26*, a rapid-growth negative regulatory candidate gene  
37 modulated by GA treatment, was overexpressed in Arabidopsis, and  
38 over-expression of *PeGATA26* significantly repressed Arabidopsis primary root  
39 length and plant height. The *PeGATA26* overexpressing lines were also resistant  
40 to exogenous GA treatment, further emphasizing that *PeGATA26* inhibits plant  
41 height from Arabidopsis to moso bamboo via GA signaling pathway.

## 42 **Conclusions**

43 Our results provide an insight into the function of GATA transcription factors in  
44 regulating shoot rapid-growth and rhizome development, and provide genetic  
45 resources for engineering plant height.

46 Running title: GATA family in moso bamboo

47 **Keywords:** GATA factors; gene family; rapid-growth; shoot; rhizome tissues;  
48 gibberellin; plant height; moso bamboo

49

## 50 **Background**

51 Moso bamboo is one of most-abundant non-timber forestry species and provides  
52 important resources for food, architecture, papermaking and fiber [1]. More  
53 importantly, moso bamboo is known for its explosive shoot growth rate, with a peak  
54 growth rate of 1 meter per day [1]. The rapid-growth shoot is largely dependent on the  
55 widespread rhizome system, which provide energy resources by absorbing from soil  
56 and more importantly, transporting from other rhizome-connected adult bamboos [2].  
57 Therefore, studying the development of shoots and rhizomes will help us understand  
58 the rapid-growth regulation of bamboo and provide effective candidate genes for  
59 genetic manipulation of crop and forestry species.

60 The GATA factors play important roles in many developmental processes by binding  
61 to the consensus DNA sequence (A/T)GATA(A/G) to regulate gene expression at the  
62 transcriptional level [3, 4]. The GATA factors have a highly conserved type IV zinc  
63 finger DNA binding domain (CX<sub>2</sub>CX<sub>17-20</sub>CX<sub>2</sub>C) and followed by a basic region [5-7].  
64 In animals, GATA factors typically contain two zinc finger domains  
65 (CX<sub>2</sub>CX<sub>17-20</sub>CX<sub>2</sub>C), while only the C-terminal domain has DNA binding function [5].

66 Animal GATAs are involved in development, differentiation, and control of cell  
67 proliferation [7]. However, the fungal GATA factors only contain a single zinc finger  
68 domain that is highly similar to the C-terminal zinc finger domain of the animal  
69 GATA factors [4, 8]. In plants, GATA factors contain  $CX_2CX_{18}CX_2C$  or  
70  $CX_2CX_{20}CX_2C$  zinc finger domain [9, 10]. Interestingly, most of plant GATA factors  
71 have a single zinc finger domain, and very few of them also contain two zinc finger  
72 domains [9-11].

73 In animals, GATA factors involve in cell differential and organ development.  
74 Mutations in animal GATA factors cause severe developmental disorder diseases  
75 including anemia, deafness, renal and cardiac defects [12]. Fungal GATA factors play  
76 roles in nitrogen control, siderophore biosynthesis, light-regulated  
77 photomorphogenesis and circadian regulation [4].

78 Plant GATA factors originates from the identification of GATA motifs in regulatory  
79 regions of light and circadian clock responsive genes [13]. The first GATA factor  
80 identified in plant is NTL1 from *Nicotiana tabacum* [14]. GATA factors have been  
81 identified in many plant species, including Arabidopsis (29), rice (28), apple (35) and

82 soybean (64) [9, 10, 15]. Plant GATA factors are involved in many developmental  
83 processes, including plant architecture [16], flowering development [17], hypocotyl  
84 elongation [18] and seed germination [19]. Plant GATA factors employ several  
85 underneath molecular mechanisms, such as modulate nitrogen metabolism [14, 20],  
86 act as transcriptional regulator by either integrity of light and phytohormone signal  
87 transduction [21, 22] or direct involvement in phytohormone signal transduction to  
88 regulate plant growth [23].

89 Plant GATA factors regulate light signal transduction by combining with GATA  
90 promoter of light related genes [24, 25]. *GATA2* (At2g45050) has also been identified  
91 as a key transcriptional regulator of the integration of light and brassinosteroid  
92 signaling pathways [22]. Recent evidences suggest that GATA factors are involved in  
93 the regulation of plant hormone signal transduction. Two orthologous GATA-type  
94 transcription factors- *GNC* and *CGA1/GNL* from *Arabidopsis thaliana* were identified  
95 as GA-regulated genes [21, 23]. Loss-of-function mutants and overexpression lines of  
96 *GNC* and *GNL* are functionally related to germination, greening, and flowering time  
97 [17]. Chromatin immunoprecipitation (CHIP) results show that these two genes are

98 direct targets of PIF transcription factors, together with the fact that *gnc* and *gnl*  
99 loss-of-function mutations suppress *gal* phenotypes, supporting that GNC and GNL  
100 are important repressors of GA signaling [21]. Another important phytohormone, auxin,  
101 is also regulated by GNC and GNL through functioning downstream of ARF2 [23]. In  
102 addition, the GATA factors are induced by cytokinin [26]. These results indicate that  
103 GATA factors play crucial roles in plant development and phytohormone-mediated  
104 growth. However, the role of GATA factors in rapid-growth and rhizome development  
105 remains elusive.

106 Recently, large-scale transcriptome analysis has shown that light and phytohormones  
107 may play important roles in the rapid-growth of bamboo [27-29]. In addition, a large  
108 number of transcription factor families are involved in the abiotic stress response and  
109 flower development have been studied in moso bamboo [30-32]. Although our group  
110 has functionally characterized rapid-growth associated key gene-*PeGSK1*, the  
111 rapid-growth associated transcription factor families are largely unexplored in moso  
112 bamboo.

113 In this study, we performed genome-wide survey of GATA factors in moso bamboo. A  
114 total of 31 GATA factors were identified in the moso bamboo genome. The  
115 phylogenetic relationship, gene structure and conserved domains of moso bamboo were  
116 systematically analyzed. The phytohormone-related *cis*-element and gene expression  
117 of *PeGATAs* under GA and auxin treatment were also characterized. More importantly,  
118 the gene expression of *PeGATAs* in different rhizome tissues and rapid-growth shoot  
119 were detailed analyzed. In addition, one of growth related PeGATA-PeGATA26 was  
120 overexpressed in Arabidopsis to functional validate its role in regulating plant height.  
121 Overall, our results provide information on the involvement of GATA factors in  
122 rhizome tissue development and rapid-growth shoot.

## 123 **Results**

### 124 **Genome-wide characterization of GATA factors in moso bamboo**

125 To identify the GATA factors in moso bamboo, the bamboo reference genome was used  
126 to scan the GATA factors using HMMER and blast tools  
127 (<http://forestry.fafu.edu.cn/db/PhePacBio/download.php>) [33]. A total of 31 potential  
128 GATA factors were identified in moso bamboo and named PeGATA1 to PeGATA31



**Table 1** GATA factors in moso bamboo

| Name     | Gene ID         | Location                 | ORF length(bp) | Size (aa) | MW (kDa) | PI   | Sub-family |
|----------|-----------------|--------------------------|----------------|-----------|----------|------|------------|
| PeGATA1  | PH0100001G0820  | 603239-605821(- stand)   | 762            | 253       | 27.2     | 7.11 | □          |
| PeGATA2  | PH01000036G1110 | 651571-655167(+ stand)   | 1212           | 403       | 42.4     | 5.2  | □          |
| PeGATA3  | PH01000040G1560 | 1013911-1015300(- stand) | 801            | 266       | 28.7     | 9.77 | •          |
| PeGATA4  | PH01000114G0660 | 460195-464981(+ stand)   | 912            | 303       | 32.2     | 5.96 | •          |
| PeGATA5  | PH01000157G0800 | 521887-523791(- stand)   | 654            | 217       | 23.2     | 6.15 | □          |
| PeGATA6  | PH01000162G1360 | 945504-954318(+ stand)   | 1500           | 499       | 56.4     | 9.4  | □          |
| PeGATA7  | PH01000232G0180 | 85809-87165(- stand)     | 420            | 139       | 15.6     | 9.23 | •          |
| PeGATA8  | PH01000242G0460 | 296415-297844(- stand)   | 648            | 215       | 22.6     | 8.2  | •          |
| PeGATA9  | PH01000263G0760 | 473691-475362(- stand)   | 1095           | 364       | 37.5     | 7.72 | □          |
| PeGATA10 | PH01000284G0590 | 365850-367843(- stand)   | 1131           | 376       | 39.3     | 5.89 | □          |
| PeGATA11 | PH01000417G1130 | 669097-674119(- stand)   | 948            | 315       | 35.8     | 8.87 | □          |
| PeGATA12 | PH01000468G1050 | 681872-683301(+ stand)   | 663            | 220       | 22.7     | 5.78 | •          |
| PeGATA13 | PH01000604G0620 | 351426-352613(+ stand)   | 399            | 132       | 14.6     | 9.36 | •          |
| PeGATA14 | PH01000750G0690 | 435897-442169(+ stand)   | 777            | 258       | 28.1     | 8.18 | •          |
| PeGATA15 | PH01000836G0660 | 444348-452795(- stand)   | 1413           | 470       | 51.6     | 8.57 | •          |
| PeGATA16 | PH01000985G0260 | 141878-143100(+ stand)   | 402            | 133       | 14.8     | 9.87 | •          |
| PeGATA17 | PH01001002G0190 | 175975-177694(+ stand)   | 831            | 276       | 29.4     | 8.98 | •          |
| PeGATA18 | PH01001129G0380 | 296297-297943(+ stand)   | 699            | 232       | 26       | 9.16 | •          |
| PeGATA19 | PH01001155G0480 | 343290-344746(- stand)   | 741            | 246       | 25.3     | 9.66 | □          |
| PeGATA20 | PH01001253G0390 | 263024-267886(- stand)   | 516            | 171       | 18.9     | 9.95 | •          |
| PeGATA21 | PH01001451G0450 | 270274-272851(- stand)   | 930            | 309       | 32.6     | 8.68 | □          |
| PeGATA22 | PH01001557G0370 | 244289-248001(+ stand)   | 594            | 197       | 20.7     | 9.14 | •          |
| PeGATA23 | PH01001584G0350 | 297120-303918(- stand)   | 1035           | 344       | 37.8     | 4.75 | •          |
| PeGATA24 | PH01001907G0160 | 109783-111580(+ stand)   | 1017           | 338       | 36.2     | 9.26 | •          |
| PeGATA25 | PH01002105G0190 | 151795-153666(+ stand)   | 1248           | 415       | 44       | 8.6  | □          |
| PeGATA26 | PH01002473G0050 | 19960-21655(- stand)     | 1011           | 336       | 36.1     | 9.64 | •          |
| PeGATA27 | PH01002681G0110 | 59436-60698(- stand)     | 690            | 229       | 24       | 8.49 | •          |
| PeGATA28 | PH01002830G0260 | 174984-177126(- stand)   | 381            | 126       | 13.8     | 9.69 | •          |
| PeGATA29 | PH01003365G0100 | 53196-55342(+ stand)     | 369            | 122       | 13.3     | 9.4  | •          |
| PeGATA30 | PH01003433G0110 | 88789-92096(- stand)     | 1167           | 388       | 39.8     | 9.33 | □          |
| PeGATA31 | PH01004789G0060 | 58264-61570(- stand)     | 993            | 330       | 35       | 6.06 | □          |

bp: base pair, aa: amino acids, MW: molecular weight, PI: isoelectric point, kDa: kilodalton

129 based on the chromosomal location. The CDS and protein sequences of PeGATA genes  
130 were listed in Additional file 1 and 2: Table S1 and S2. The detailed information of  
131 these PeGATA factors including length of CDS, size of amino acid, molecular weight  
132 (MW) of protein, gene location on chromosome and isoelectric point (PI) were listed in  
133 Table 1.

134 The length of CDS ranges from 366 bp to 1,500 bp, and the length of proteins ranges  
135 from 122 aa to 499 aa (Table 1). PeGATA29 is the smallest GATA protein with 122  
136 amino acids, and the largest protein is PeGATA6 with 499 amino acids (Table S1). The  
137 predicted molecular weight of 31 PeGATA proteins ranges from 13.3 kDa (PeGATA29)  
138 to 56.4 kDa (PeGATA6) with an average size of 29.86 kDa (Table 1). The predicted PI  
139 of 31 PeGATA factors are all below 10.0, and the minimal protein is PeGATA23 with  
140 only 4.75 (Table 1).

141 To further investigate and characterize sequence conservation in the GATA proteins,  
142 multiple sequence alignments were performed using the amino acid sequences of the  
143 conserved GATA motifs in 31 PeGATAs (Fig. 1). Most bamboo GATA factors contain a  
144 single zinc finger domain. However, unlike Arabidopsis, several bamboo GATA factors  
145 contain multiple zinc finger domains (Fig. 2). Most of bamboo GATA factors contain  
146 18 residues in the zinc finger loop (CX<sub>2</sub>CX<sub>18</sub>CX<sub>2</sub>C), while five of them have 20  
147 residues in the zinc finger loop (CX<sub>2</sub>CX<sub>20</sub>CX<sub>2</sub>C) (Fig. 1). Interestingly, the gene  
148 subfamily analysis revealed that all of these five PeGATA factors all belong to the Class  
149 C type of the PeGATA family (Fig. 3). Similar to Arabidopsis and rice, moso bamboo

150 does not contain the animal- and fungal-type  $CX_2CX_{17}CX_2C$  zinc finger domains (Fig.  
151 1). Notably, five PeGATA genes factors have a defective GATA zinc finger domain (Fig.  
152 1). PeGATA1 lacks the first Cys residue (-SHC) and PeGATA30 lacks the last Cys  
153 residue (CND-). Meanwhile, the GATA factors PeGATA14, PeGATA17 and  
154 PeGATA18 have only partial GATA motif (SRLTPAMRRGPTGPRSLCNAC for  
155 PeGATA14, CSDCNTTKTPLWRSGPCGPKAA for PeGATA17 and  
156 CSDCNTTKTPLWRSGP for PeGATA18) (Fig. 1). The observation is similar to the  
157 rice GATA factors as OsGATA24 also contains a partial GATA motif [9]. The results  
158 indicated that the bamboo GATA factors have a highly conserved GATA motif,  
159 especially compared to rice.

160 To further reveal the diversification of GATA genes in moso bamboo, putative  
161 conserved functional domain and motifs were also predicted in the NCBI conserved  
162 domain database and program MEME. Through MEME analysis, 10 motifs among the  
163 different gene subfamilies is shown in Fig. 2 and the identified multilevel consensus  
164 sequence for the motifs is shown in Additional file 3: Table S3. Motif 1 and 5 presented  
165 in 29 PeGATA proteins and they were annotated as conserved GATA zinc finger

166 domain  $CX_2CX_{18}CX_2C$  and  $CX_2CX_{20}CX_2C$ , respectively (Fig. 2). Motif 5 was not  
167 found in PeGATA1, PeGATA14 and PeGATA23 by MEME (Fig. 2), which may be  
168 attributed to the zinc finger GATA subfamily domain corresponding to the conserved  
169 domain. Motif 2, 7 and 10 appeared nearly all members in subfamily I, and motif 4 and  
170 motif 6 only appeared in subfamily II (Fig. 2). Motif 3 was identified as the CCT  
171 domain and motif 9 was identified as TIFY domain (Fig. 2). These two domains were  
172 specific to subfamily III that was consistent with the classification by conserved  
173 domain as shown in Fig. 2. The identification of subfamily-specific motifs from  
174 bamboo GATA factors suggests that these motifs may contribute to the functional  
175 differences among different subfamilies.

176 **Comparison analysis of the GATA subfamily among Arabidopsis, rice and moso**  
177 **bamboo**

178 GATA factors in Arabidopsis and rice are classified in the clade A-D according to the  
179 residues of zinc fingers [9]. To determine the phylogenetic relationship among GATA  
180 genes in Arabidopsis, rice and moso bamboo, unrooted phylogenetic tree with 90  
181 GATA factor sequences from all three species was constructed. The phylogenetic tree

182 analysis shows that all GATA factors have three major clades (Classes A, B and C) (Fig.  
183 3). Among them, Class A is the largest clade and contains 38 members. In this clade,  
184 twelve bamboo GATA factors (PeGATA1/2/5/6/9/10/11/19/21/25/30/31) clustered with  
185 the Arabidopsis GATA factors AtGATA1, AtGATA2, and AtGATA4, which have been  
186 reported to be involved in light regulation of gene expression and photomorphogenesis  
187 [22, 34]. Class B formed the second largest clade containing 33 members and 13  
188 bamboo GATA factors (PeGATA3/7/8/12/13/16/17/18/24/26/27/28/29) clustered with  
189 the Arabidopsis GATA factors AtGATA21 (GNC) and AtGATA22. These two GATA  
190 factors regulates phytohormone response, chlorophyll biosynthesis, starch production,  
191 plant architecture, and nitrogen metabolism [17, 21, 23, 34, 35]. In Class C, six bamboo  
192 GATA factors (PeGATA4/14/15/20/22/23) clustered with the Arabidopsis GATA factor  
193 AtGATA25 (ZIM, Zinc-finger protein expressed in Inflorescence Meristem) and shows  
194 the potential roles of hypocotyl and petiole elongation [18]. It is worth noting that no  
195 bamboo GATA factor is found in Class D, which explains that bamboo GATA factors  
196 may have different functions compared to Arabidopsis and rice.

197 **Gene structure of bamboo GATA genes in moso bamboo**

198 To determine the phylogenetic relationships among different members of the GATA  
199 factors in moso bamboo, a phylogenetic analysis based on alignments of the 31  
200 full-length GATA protein sequences was performed. As shown in Fig. 1 and Fig. 3, the  
201 protein sequence alignment and neighbor-joining phylogenetic tree divides 31  
202 PeGATAs into three clades according to the pattern of zinc finger domain or  
203 homologous domains to the Arabidopsis and rice GATA factor families. The gene  
204 structure of the *PeGATA* genes was shown in Fig. 4. The total exon numbers of  
205 *PeGATAs* from each subfamily were calculated. Subfamily I comprised 12 members  
206 with two or three exons except *PeGATA19* and *PeGATA6*. *PeGATA19* has only one  
207 exon and *PeGATA6* has more than three exons with long introns. Subfamily II consists  
208 of 13 members, and all of them contain two or three exons. Subfamily III was formed  
209 by included 6 members with five to twelve exons (Fig. 4). The gene structure of GATA  
210 factors is similar to that of rice [9]. Overall, the *PeGATA* genes contain exons ranging  
211 from one to twelve in its CDS, and the gene structure is obviously different from each  
212 other. The results indicated that the bamboo *GATA* genes have undergone significant  
213 changes during its long evolutionary history.

214 **Identification of hormone-related *cis*-elements in the promoter of the *PeGATA***

215 **genes**

216 To further explore the function and regulatory pattern of the *PeGATA* gene, the  
217 PlantCARE database was used to scan the putative *cis*-elements inside the 1500 bp  
218 upstream of transcription start site. We categorized *cis*-elements into four categories  
219 based on their functions: light response elements, development, hormone and stress  
220 associated *cis*-elements ( Fig. 5). The predicted *cis*-elements in *PeGATA* genes were  
221 closely related to the function of the GATA family in other plants [17, 19, 22, 23, 25].  
222 Light responsive elements like G-box, GT1 and TCT were widely present in the  
223 promoter of *PeGATA* genes, and the G-box element has been reported to be involved in  
224 the regulation of chlorophyll II biosynthesis in Arabidopsis [36]. We also identified  
225 several hormone-responsive *cis*-elements such as ABRE [37], CGTCA-motif, TGACG,  
226 and TCA-elements (abscisic acid, MeJA and salicylic acid), and abiotic  
227 stress-responsive elements including ARE, GC-motif, LTR and MBS. In addition,  
228 tissue specific elements such as CAT-box, circadian responsive element and cell cycle  
229 regulation elements like MSA-like were also found in the promoter of the *PeGATA*

230 genes, which may have function in the regulation of plant morphology, flowering and  
231 growth [38]. Overall, *cis*-elements analysis indicated that bamboo GATA factors might  
232 be involved in response to light and phytohormone to regulate growth.

233     Transcription factors are typically located in the nucleus and regulate transcription of  
234 the target genes by binding to the *cis*-elements in their promoters. Consistent with our  
235 hypothesis, subcellular localization assays in tobacco showed that randomly selected  
236 bamboo *GATA* genes *PeGATA7*, *20*, *26* and *28* were clearly localized in the nucleus  
237 according to the GFP and DAPI stain signals (Fig. 6). Localization analysis revealed  
238 that bamboo GATA factors could also act as transcription factors to regulate gene  
239 expression.

#### 240 **Dynamic gene expression pattern of *PeGATAs* in rhizome tissues**

241 The bamboo rhizome system can be divided into three groups: lateral buds, rhizome  
242 tips, and new shoot tips [2]. The widespread rhizome system is essential for  
243 rapid-growth of bamboo shoot through adopting and utilizing nutrients including  
244 nitrate [39]. The GATA factors are also related to nitrogen metabolism in other species  
245 [20], so we firstly checked if GATA genes expressing differentially in lateral buds,



246 rhizome tips, and new shoot tips. By analyze the RNA-seq data from our previous study  
247 [2], we showed significant differential expression pattern of *PeGATA* genes among  
248 different rhizome tissues (Fig. 7a, Additional file 4: Table S4). As shown in Fig. 7a, a  
249 total of 15 *PeGATA* genes (*PeGATA1*, 5, 9, 10, 14, 18, 19, 20, 21, 23, 25, 26, 27, 28 and  
250 29) showed significantly higher expression in lateral buds than that from other two  
251 tissues. Five *PeGATA* genes (*PeGATA6*, 7, 8, 11 and 22) highly expressed in the new  
252 shoot tips, while reduced their expression in lateral buds. In the rhizome tips, seven  
253 *PeGATA* genes (*PeGATA2*, 3, 4, 15, 16, 24 and 30) have remarkable higher expression  
254 than other two tissues. In addition, *PeGATA12* and 31 expressed highly both in lateral  
255 buds and rhizome tips, while slightly expressed in new shoot tips. Overall, 29 of the 31  
256 *PeGATA* genes showed differential expression in three bamboo rhizome tissues,  
257 suggesting that PeGATA factors may contribute to the growth regulation of rhizome.

258 **Expression profile of *PeGATAs* in bamboo under the treatment of exogenous**  
259 **phytohormone**

260 GATA factors are closely related to phytohormones to regulate Arabidopsis growth and  
261 development [21, 23], take together with the identification of phytohormone related

262 *cis*-elements in the promoter of the bamboo *GATA* genes (Fig. 5b), we rationally  
263 hypothesized that the *PeGATA* genes are also tightly regulated by phytohormones. To  
264 test our hypothesis, we performed gene expression analysis of the *PeGATA* genes under  
265 GA and auxin treatment based on the RNA-seq data published in the previous studies  
266 [28, 40]. A total of 12 *PeGATA* genes showed significant gene expression under GA  
267 treatment (Fig. 7b, Additional file 5: Table S5). Among them, the expression of  
268 *PeGATA7*, *9*, *10*, *19*, *30* and *31* was increased in GA<sub>3</sub> (100 μM) treated seedlings  
269 compared to that from untreated control (Fig. 7b). The largest difference was observed  
270 in *PeGATA10* (increased by 3.22-fold after GA<sub>3</sub> treatment). In contrast, six genes  
271 (*PeGATA1*, *17*, *18*, *24*, *25* and *26*) showed lower expression in GA<sub>3</sub>-treated seedlings  
272 than control seedlings (Fig. 7b). *PeGATA26* was the most down-regulated gene with a  
273 56% expression level reduction, and followed by *PeGATA18* with a 54% decline. It is  
274 worth noting that the other 19 *PeGATA* genes did not show significant expression  
275 change under GA treatment. These results indicate that the gene expression of  
276 *PeGATAs* is at least partially regulated by GA.

277 To test the relationship between *PeGATA* gene expression and auxin, we also analyzed  
278 the gene expression pattern of *PeGATA* genes under NAA treatment (5  $\mu$ M NAA) in  
279 bamboo seedlings (Fig. 7c, Additional file 6: Table S6). Interestingly, unlike the results  
280 of GA treatment, only *PeGATA8* and *PeGATA9* showed significant gene expression  
281 change under auxin treatment. Although the expression levels of some other genes  
282 including *PeGATA1*, 2, 10, 16 and 22 were slightly changed, the gene expression of  
283 most *PeGATA* genes did not change under auxin treatment (Fig. 7c), suggesting that  
284 *PeGATAs* may not be affected by auxin. Overall, these results suggest that *PeGATAs*  
285 are partially regulated by GA, but are not affected by auxin.

### 286 **Genes expression pattern of *PeGATAs* in the rapid-growth of bamboo shoots**

287 As the rapid-growth of bamboo shoots is largely determined by phytohormone and  
288 nutrients [2, 27], and we have demonstrated that *PeGATAs* are differentially expressed  
289 in rhizome tissues and under GA treatment (Fig. 7a, b), we hypothesized that *PeGATAs*  
290 may also be involved in fast-growing bamboo shoots. To validate our hypothesis, the  
291 expression profiles of the *PeGATAs* in the fast-growing bamboo shoots (0.15 m, 0.5 m,  
292 1.6 m, 4.2 m and 9 m) were examined by qRT-PCR (Fig. 8). The results showed that

293 almost all GATA genes changed their gene expression in at least one of fast-growing  
294 stages. Among them, seven *PeGATA* genes (*PeGATA1*, 3, 9, 12, 14, 16, 26 and 31)  
295 continued to decrease their gene expression with the increase of shoot height (Fig. 8).  
296 The best example is *PeGATA9*, which showed over 30-fold expression reduction in  
297 9-meter shoots compared to 0.15-meter shoots. The results indicate that these *PeGATAs*  
298 genes may be negatively correlated with shoot height. Another groups of *PeGATA*  
299 genes (*PeGATA5*, 6, 7, 8, 11, 15, 16, 20, 21, 22, 23, 24, 27, 28, 29 and 30) showed  
300 minimal gene expression at the middle growth stages. The results indicate that these  
301 *PeGATAs* play an important role in the negative regulation of shoot growth at the  
302 middle shoot development stages. Another sets of *PeGATA* genes (*PeGATA2*, 4, 10 and  
303 19) increased their expression at early shoot developmental stages, and then reduce  
304 their expression along with the increase of shoot heights. Finally, three *PeGATA* genes  
305 (*PeGATA17*, 18 and 27) were increased their expression during early shoot  
306 developmental stages, then reduced their expression during middle developmental  
307 stages, and then increased their expression again during late shoot developmental  
308 stages. Interestingly, we did not find that any *PeGATA* genes continued to increase its

309 expression along with bamboo shoot development. Overall, our results indicate that

310 *PeGATAs* genes may be negatively correlated with rapid-growth of bamboo shoots.

311 **Over-expression of *PeGATA26* negatively regulates plant height in Arabidopsis**

312 To understand the function of PeGATA factors, we chose PeGATA26 as an example to

313 verify the role of PeGATA factors in plant growth. *PeGATA26* showed higher gene

314 expression in the growth-inactive lateral buds than the growth-active rhizome tips and

315 new shoot tips (Fig. 7a). Moreover, *PeGATA26* have lower gene expression under GA

316 treatment (Fig. 7b), and its expression decreased along with rapid-growth of bamboo

317 shoots (Fig. 8). These results suggest that *PeGATA26* act as a negative regulator of plant

318 growth and height in moso bamboo. Therefore, we hypothesized that *PeGATA26* plays

319 a crucial role in regulating plant growth. In a previous study, we successfully

320 characterized one of the fast growth-suppressing genes *PeGSKI* by over-expressing it

321 into Arabidopsis [1]. Therefore, we used a similar strategy to verify the function of

322 *PeGATA26* in regulating plant growth by over-expressing it into Arabidopsis.

323 The homozygous T3 transgenic lines were used to analyze phenotype, and

324 over-expression of *PeGATA26* resulted in a significant growth retardation phenotype

325 (Fig. 9a). Gene expression of *PeGATA26* was successfully detected by qRT-PCR (Fig.  
326 9b). The phenotypes between the two over-expressing lines were similar and the  
327 intensity of phenotype correlated with the expression of each transgenic lines (Fig. 9a).  
328 Therefore, *PeGATA26* over-expressing line 1 (PeGATA26-ox1) with a stronger  
329 phenotype was used for further detailed phenotypic analysis. Interestingly,  
330 PeGATA26-ox1 showed a significant dwarf phenotype with a dramatic shorter  
331 inflorescence compared to the control (Fig. 9c), indicating that *PeGATA26* inhibits  
332 growth of plant height. Moreover, *PeGATA26* also repressed primary root growth (Fig.  
333 9c). However, *PeGATA26* promoted Arabidopsis hypocotyl length (Fig. 9c). These  
334 results indicate that *PeGATA26* regulates plant growth in a tissue-specific manner:  
335 repressing cell growth in roots and inflorescences, while promoting cell growth in  
336 hypocotyls.

337 As *PeGATA26* was down-regulated under the GA treatment in bamboo seedlings (Fig.  
338 7b), we subsequently analyzed whether PeGATA26 was also regulated by GA in  
339 Arabidopsis. Interestingly, exogenous GA treatment did not recovery the dwarf  
340 phenotype of PeGATA26-ox1 (Fig. 9d), indicating that PeGATA26 is negatively

341 correlated with GA to regulate plant height in Arabidopsis. Similar to the results of its  
342 Arabidopsis orthologous gene [21], the gene expression pattern of the GA signaling  
343 pathway genes in PeGATA26-ox1 were also similar to those observed in the GA  
344 biosynthesis mutants- *gal* (Fig. 9e). The results support that PeGATA26 also repressed  
345 GA signaling downstream of the DELLA protein. These results suggest that  
346 PeGATA26 inhibits plant root and stem growth in Arabidopsis, take together with its  
347 gene expression negatively correlated with the growth of rhizome tissues and shoot in  
348 moso bamboo, we concluded that PeGATA26 is a negative growth regulator for plant  
349 height control from Arabidopsis to moso bamboo.

350

## 351 **Discussion**

352 Moso bamboo is one of important non-timber forestry species with great value in  
353 providing food and building materials [33]. Moreover, bamboo is known for its  
354 fast-growing shoots and widespread rhizomes [2]. It has been reported that several gene  
355 families are involved in flower development and abiotic stress [30-32, 41], the  
356 rapid-growth associated transcription factors remain elusive. The genome sequences of

357 moso bamboo[33] and transcriptome studies [2, 27, 28, 40] provide important  
358 platforms for the identification of rapid-growth shoot and rhizome development  
359 associated gene families. The rapid-growth related genes could provide useful  
360 information for genetic manipulation of plant height in future.

361 GATA factors have key functions in developmental control and response to the  
362 environmental stresses [16, 17, 19]. In this study, we characterized 31 GATA factors  
363 from the moso bamboo (Table 1), and PeGATA factors have highly conserved zinc  
364 finger protein domains compared to Arabidopsis and rice GATA factors (Figs. 1-4).  
365 More importantly, gene expression analysis of *PeGATAs* in different rhizome tissues  
366 and fast-growing bamboo shoots showed that several *PeGATAs* had negative  
367 expression patterns with bamboo shoots and rhizome growth (Figs. 7a, 8). Furthermore,  
368 the gene expression of *PeGATAs* was partially dependent on phytohormone-GA in  
369 bamboo (Figs. 7b). Moreover, overexpression of *PeGATA26* in Arabidopsis repressed  
370 the growth of root and plant height in a GA dependent manner (Fig. 9). Overall, our  
371 results indicate that *PeGATAs* are involved in regulating the growth of plant height  
372 from Arabidopsis to moso bamboo probably through GA signaling pathway.



373 Bioinformatics analysis showed that there were 31 PeGATA factors in moso bamboo  
374 (Fig. 1). The number of bamboo GATA factors was closer to other species, including  
375 Arabidopsis (29), rice (28) and apple (35) [9, 10, 15]. Furthermore, most of PeGATA  
376 factors have a conserved single CX<sub>2</sub>CX<sub>18-20</sub>CX<sub>2</sub>C zinc finger domain that is highly  
377 similar to that from Arabidopsis and rice (Fig. 1). In addition, the subfamily of I to III  
378 from moso bamboo showed a highly evolutionary conservation compared to  
379 Arabidopsis and rice (Fig. 3). These results indicate that most of the GATA factors from  
380 moso bamboo are conserved compared to other species. However, unlike containing  
381 only one zinc-finger domain in subfamily I GATA factors from Arabidopsis and rice [9],  
382 PeGATA6 and PeGATA11 from the bamboo GATA subfamily I have two GATA-type  
383 zinc finger domains (Fig. 1). Moreover, more protein domains from the bamboo GATA  
384 subfamily III were identified compared to that from Arabidopsis and rice (Fig. 2).  
385 Interestingly, a unique feature of the PeGATA factors is that they only have three  
386 subfamilies compared to the four subfamilies of Arabidopsis and rice (Fig. 3). These  
387 differences suggest that PeGATAs do have certain specificity compared to that from  
388 Arabidopsis and rice. Future analysis the functions of GATA factors, including

389 AtGATA26, AtGATA27 and OsGATA30 from subfamily IV (Fig. 3), can help us reveal  
390 why bamboo lacks these GATA factors.

391 The first GATA factor is identified according to the light and circadian clock related  
392 *cis*-elements in its promoters [13]. Thus, the function of the GATA factors can be  
393 predicted based on the identification of *cis*-elements from their promoter. In this study,  
394 we found that the promoter of *PeGATAs* has many important *cis*-elements, including  
395 light responsive element, cell cycle regulation and phytohormone responsive elements  
396 (Fig. 5), which are closely related to the regulation of plant growth. Thus, *PeGATAs*  
397 may be involved in regulating plant growth through these *cis*-elements to affect their  
398 gene expression and further downstream genes.

399 The bamboo has a well-established rhizome system to develop new shoot tips and  
400 widespread rhizome tips [2, 39]. However, the lateral buds of bamboo rhizomes are not  
401 active and dominant in growth [2]. Therefore, identification of GATAs with different  
402 expression patterns in these tissues will help us clarify the role of GATA factors in  
403 rhizome development, which remains unclear. In this study, we found that 15 *PeGATA*  
404 genes are highly expressed in lateral buds (Fig. 7a). Among them, *AtGATA2*

405 (orthologous gene of *PeGATA9*) has been reported to have a function to restrict cell  
406 division in the proliferation domain of Arabidopsis root meristem [42], and high  
407 expression of *PeGATA9* in lateral buds indicates that *PeGATAs* may also be involved in  
408 inhibiting the cell division in bamboo lateral buds (Fig. 7A). In contrast, the lower  
409 expression of *PeGATA9* in the actively growing new shoot tips and rhizome tips (Fig.  
410 7A), suggesting a negative correlation between *PeGATA9* and cell growth in bamboo  
411 rhizome. It has been reported that *AtGATA22*, a orthologous gene of *PeGATA18*, is  
412 involved in response to cytokinin and negatively regulates root growth in Arabidopsis  
413 [43], we found that *PeGATA18* has higher gene expression in lateral buds (Fig. 7a),  
414 suggesting that *PeGATA18* may play a role in negative regulation of lateral buds cell  
415 growth. Similarly, the orthologous gene of *PeGATA26* also plays a negative role in  
416 elongation growth [21]. Overall, these results suggest that these 15 *PeGATAs* may  
417 contribute to negatively regulating the growth of lateral buds. Next, five *PeGATAs* were  
418 highly expressed in the new shoot tips than the other two tissues (Fig. 7a). Among them,  
419 the mutation of *GATA19* (orthologous gene of *PeGATA8*) in Arabidopsis causes  
420 meristem defects [44]. Here, the high expression of *PeGATA8* in new shoot tips (Fig.

421 7a), suggests that *PeGATA8* may also be involved in the regulation of shoot meristem  
422 development in bamboo. Furthermore, seven *PeGATAs* were highly expressed in the  
423 rhizome tips, indicating that they are involved in the growth of the rhizome tips (Fig.  
424 7a). Overall, more than 87% of *PeGATAs* (27/31) was highly expressed in one of  
425 rhizome tissues (Fig. 7a). The results indicate that *PeGATAs* strongly participate in the  
426 regulation of rhizome growth. Once the transformation system is ready in future,  
427 functional characterization of these *PeGATAs* in moso bamboo will help us elucidate  
428 the exact role of *PeGATAs* in rhizome growth control.

429 The correlation between GATA factors and GA or auxin has been extensively studied in  
430 Arabidopsis [21, 23, 42, 45]. In this study, we found that gene expression of 12  
431 *PeGATAs* changed under GA treatment, while only two *PeGATAs* responded to auxin  
432 treatment (Fig. 7b, c). In addition, motif analysis indicated that the promoter of  
433 *PeGATAs* has more GA-related *cis*-elements than auxin (Fig. 5b). Our results indicate  
434 that GA rather than auxin frequently regulates the expression of *PeGATAs* in moso  
435 bamboo.

436 Gene expression analysis showed that almost all *PeGATAs* have changed their  
437 expression during the rapid-growth of bamboo shoots (Fig. 8). For example, *GATA2*  
438 (orthologous gene of *PeGATA9*) limits cell division in root meristem of Arabidopsis  
439 [42], and the expression of *PeGATA9* was down-regulated over 30 times in late  
440 rapid-growth stage (9 m) than the early stage (0.15 m) (Fig. 8). The results indicate that  
441 *PeGATA9* may also negatively regulate the rapid-growth of bamboo shoot.  
442 Identification of many rapid-growth related *PeGATAs* indicates that *PeGATAs* are  
443 involved in regulating the bamboo shoot. The rapid-growth of bamboo shoot is tightly  
444 controlled by phytohormone [27]. Current studies reveals that ABA is the only negative  
445 regulator of fast-growing shoots, while BR, auxin, GA and cytokinin antagonize with  
446 ABA to promote rapid-growth of bamboo shoots [27]. Interestingly, all of the 12  
447 GA-related *PeGATAs* showed differential expression in at least one of rapid-growth  
448 stages (Figs. 7b, 8), suggesting that GA may regulate rapid-growth of bamboo shoots  
449 via modulating gene expression of *PeGATAs*. To understand the function of GA-related  
450 *PeGATAs* in plant height control, *PeGATA26* was selected to validate its role in  
451 Arabidopsis growth (Fig. 8). Overexpression of *PeGATA26* in Arabidopsis resulted in

452 growth retardation phenotypes such as dwarfism and shorter primary root length, and  
453 the *PeGATAs* over-expressed lines was resistant to GA treatment (Fig. 8). Overall, these  
454 results further support that *PeGATAs* could regulate plant heights from Arabidopsis to  
455 moso bamboo via GA signaling pathway.

## 456 **Conclusions**

457 With the explosive growth rates of bamboo shoots and widespread rhizomes, the  
458 identification of key regulatory genes in the bamboo shoot and rhizome growth control  
459 will provide important genetic resources for the genetic manipulation of plant height. In  
460 this study, we characterized 31 GATA factors from moso bamboo. More importantly,  
461 the gene expression of *PeGATAs* is closely related to the development of rhizome  
462 tissues and rapid-growth of bamboo shoots. Moreover, the gene expression of  
463 *PeGATAs* was partially regulated by the phytohormone-GA in bamboo. In addition,  
464 functional characterization of *PeGATA26* in Arabidopsis provides insight into how  
465 *PeGATAs* regulate plant height from Arabidopsis to bamboo via the GA signaling  
466 pathway. However, we also noticed that GA regulates expression of only part of  
467 *PeGATAs*. As ABA-related *cis*-elements are more widespread than GA, and ABA is the

468 only known negative regulatory hormones in the rapid-growth control of bamboo  
469 shoots, we cannot rule out that *PeGATAs* may also regulate plant height through ABA  
470 signaling pathway. In summary, our results provide certain evidence that GATA  
471 transcription factor regulate the development of rhizome tissues and the rapid-growth  
472 of bamboo shoots.

## 473 **Methods**

### 474 **Identification of GATA factors in moso bamboo**

475 To identify the GATA factors, the genome and protein sequences of moso bamboo were  
476 downloaded from BambooGDB database  
477 (<http://forestry.fafu.edu.cn/db/PhePacBio/download.php>) [33]. GATA protein  
478 sequences from Arabidopsis and rice were obtained from previous published data [9].  
479 We performed multiple sequence blast and alignment with an expected value of 10. The  
480 HMMER profile of the GATA domain (PF00320) from Pfam (<http://pfam.xfam.org/>)  
481 was used to search the bamboo protein database with a threshold: e-values < 10<sup>-5</sup> [46].  
482 The bamboo GATA factors were determined with the criteria: it is present in both blast  
483 and HMMER motif analysis lists. The number of amino acid, molecular weights (MWs)

484 and isoelectric points (PI) of bamboo GATA factors were predicted by ProtParam  
485 (<https://web.expasy.org/protparam/>).

#### 486 **Phylogenetic tree, conserved domain, motif recognition and *cis*-elements analysis**

487 Multi-sequence alignment of the GATA protein sequences was carried out by ClustalX  
488 [47], and phylogenetic tree was constructed using MEGA7 by the Neighbour-Joining  
489 method (bootstrap analysis for 1000 replicates) [48]. Conserved domains were obtained  
490 from NCBI (<https://www.ncbi.nlm.nih.gov/cdd>) [49] and motifs were analyzed using  
491 MEME with default parameters (version 5.0.5, <http://meme-suite.org/tools/meme>) [50].  
492 For *cis*-elements analysis, DNA sequences from 1.5-kb upstream region of each  
493 *PeGATA* gene were used to scan any potential *cis*-element using the PlantCARE  
494 database (<http://bioinformatics.psb.ugent.be/webtools/plantcare/html/>) [51].

#### 495 **Subcellular localization analysis**

496 To verify the location of PeGATAs, the full-length CDSs without stop codon from four  
497 *PeGATA* genes were cloned into a modified pCambia3301 vector with C-terminal GFP  
498 as described in our previous study [1]. The *ACTIN2::PeGATAs*-GFP and the  
499 *ACTIN2::GFP* control constructs were then transiently transformed into tobaccos, and



500 GFP and DAPI fluorescence was observed using a microscope (20x, Zeiss,  
501 LSM880).

### 502 **Gene expression analysis**

503 To investigate gene expression levels of the PeGATA genes in different tissues or  
504 hormone treatments, RNA-seq data was downloaded from Short Read Archive (SRA)  
505 database for the lateral buds, rhizome tips and new shoot tips (SRP093919) [2], and  
506 bamboo seedlings under GA and auxin treatment (SRP119416 and SRP109631) [28,  
507 40], respectively. The pair-end reads were mapped to the moso bamboo reference  
508 genome using tophat2, and differential expressed genes were detected by cufflinks with  
509 defaults parameters [52].

### 510 **Plant materials and qRT-PCR analysis**

511 The moso bamboo shoots used in this study were collected in JianOu County (E118°28';  
512 N27°00'), Fujian Province, China. The middle internode of different height of bamboo  
513 shoots were sampled and stored in liquid nitrogen immediately.  
514 qRT-PCR analysis was performed for each member of the GATA family genes during  
515 the rapid-growth of bamboo shoots. Total RNA was extracted from the bamboo

516 samples using HiPure Plant RNA Mini Kit (Magen, R4151-02) and 1 $\mu$ g RNA was  
517 taken for reverse transcription into cDNA using a commercial Kit (Monad,  
518 RN05004M). Primers for qRT-PCR were designed on Primer3 (<http://primer3.ut.ee/>)  
519 using the CDS of each PeGATA gene. qRT-PCR were performed using MonAmp™  
520 ChemoHS qPCR Mix (Monad, RN04002M) in a 20  $\mu$ l reaction. The following program  
521 was used for qRT-PCR: 95 °C for 5 min; 40 cycles of 95 °C for 10 s, 60 °C for 10 s and  
522 72 °C for 30 s.

### 523 **Ectopic expression analysis**

524 The *PeGATA26* was cloned and expressed in Arabidopsis exactly following the  
525 procedures for the *PeGSK1* in our previous study[1]. The T3 generation seedlings were  
526 used for phenotype analysis. The primary root length, plant height and hypocotyl length  
527 were measured using ImageJ[1].

528 The primers used in this study were listed in Additional file 7: Table S7.

### 529 **Declarations**

#### 530 *Competing interests*

531 The authors declare that they have no competing interests.

532 ***Funding***

533 This work was supported by the National Natural Science Foundation of China (Nos.  
534 31741025 and 31500258 to L.M), the Outstanding Youth Research Talents  
535 Development Program in Fujian Province University to Liuyin Ma, the Outstanding  
536 Youth Research Talents Program of Fujian Agriculture and Forestry University (No.  
537 KXJQ17011 to L.M.), and the Scientific Research Foundation of the Graduate School  
538 of Fujian Agriculture and Forestry University (to T.W.).

539 ***Author contributions***

540 T.W., C.L., and L.M. conceived the ideas. T.W. and W.W. performed the experiments.  
541 T.W., Y.Y., S.L. and Z.Z. contributed to data analysis. T.W. and L.M. wrote the  
542 manuscript.

543 **Figure legends**

544 **Fig. 1** Alignment of the amino acid sequences of bamboo GATA factors. The GATA  
545 motifs and amino acid positions are marked with a box and an asterisk. The sequence  
546 identities of GATA motifs are shown at the bottom.

547 □ **Fig. 2** Schematic diagram of conserved domain analysis in bamboo GATA proteins.

548 Each color represents a different motif.

549 **Fig. 3** Phylogenetic analysis of GATA factors in bamboo, rice and Arabidopsis. The  
550 phylogenetic tree was made based on the amino acid sequences using MEGA7.0 by  
551 the neighbor-joining method with 1000 bootstrap replicates. The tree shows four  
552 major phylogenetic classes (Classes A to D) indicated by different colors.

553 □ **Fig. 4** Phylogenetic analysis and gene structure of bamboo GATA factors. (a)  
554 Phylogenetic tree construction of the PeGATA factors based on the amino acid  
555 sequences using MEGA 7.0. The tree showed three major phylogenetic subfamilies  
556 (subfamilies I to •) , represented by different colored backgrounds. (b) CDS/UTR  
557 structure of the *PeGATA* genes. The yellow and green boxes indicate exons and UTRs,  
558 and the black lines represent introns. The size of exons and introns can be estimated  
559 using the scale at the bottom.

560 **Fig. 5** *Cis*-elements analysis in the promoter of bamboo *GATA* genes. (a): Overview  
561 of the main types of *cis*-elements identified from the 1.5-kb upstream sequence of the  
562 bamboo *GATA* genes by the PLANTCARE database. (b): Hormone related  
563 *cis*-elements were analyzed and each colored block with numbers represents the

564 number of *cis*-elements in the bamboo GATA promoter.

565 **Fig. 6** Subcellular localization analysis of bamboo GATA factors. The bamboo  
566 GATA genes were cloned and constructed in a modified pCambia3301 vector with a  
567 C-terminal GFP fusion. These vectors were transformed into tobacco, and the GFP  
568 and DAPI signals were captured from the identical areas by microscopy (20x).

569 **Fig. 7** Expression profiles of bamboo GATA genes in different tissues and hormone  
570 treatment. (a): The gene expression of 31 bamboo GATA genes in different rhizome  
571 tissues was presented by heatmap. (b) and (c): The expression of bamboo GATA  
572 genes in the seedlings under GA and auxin treatment. Expression values were  
573 normalized and presented at the right side, and green represents lower expression  
574 level and red indicates a higher expression level.

575 **Fig. 8** The expression level of GATA genes in bamboo shoots. The gene expression  
576 values were detected by qRT-PCR. The Y-axis and X-axis indicate relative expression  
577 level at different height of shoots. S1: 0.15 m shoots; S2: 0.5 m shoots; S3: 1.6 m  
578 shoots; S4: 4.2 m shoots; S5: 9 m shoots.

579 **Fig. 9** Ectopic expression of *PeGATA26* inhibits the plant height of Arabidopsis. (a):

580 Overexpression of *PeGATA26* resulted in a dwarf phenotype in Arabidopsis. (b):  
581 The expression level of *PeGATA26* were detected in both transgenic with the *ACTIN2*  
582 gene as an internal control. (c): Phenotypic analysis of plant height, hypocotyl length  
583 and primary root length in *PeGATA26* overexpressing line 1 compared to control.  
584 They all have significant differences compared to the control by the t-test:  $P \leq 0.0001$ ,  
585 which was represented by four stars in the figure. (d): Overexpression of *PeGATA26*  
586 repressed plant height of Arabidopsis and *PeGATA26-ox1* was resistant to exogenous  
587 GA treatment. (e): The expression of GA signaling genes in the *PeGATA26-ox1* was  
588 similar to that of GA biosynthesis mutants-*gal*. The expression of GA signaling genes  
589 was detected by qRT-PCR and the *ACTIN2* was used as the internal control.

590

## 591 **SUPPORTING INFORMATION**

### 592 **Additional files**

593 **Additional file 1: Table S1.** The coding region sequences of *PeGATA* genes.

594 **Additional file 2: Table S2.** The amino acid sequences of *PeGATA* factors.

595 **Additional file 3: Table S3.** List of protein motifs identified in *PeGATA* factors.

---

596 **Additional file 4: Table S4.** Gene expression of *PeGATA* genes in different rhizome  
597 tissues.

598 **Additional file 5: Table S5.** Gene expression of *PeGATA* genes under GA treatment.

599 **Additional file 6: Table S6.** Gene expression of *PeGATA* genes under auxin  
600 treatment.

601 **Additional file 7: Table S7.** List of primers used in this study.

602

## 603 **References**

- 604 1. Wang T, Li Q, Lou S, Yang Y, Peng L, Lin Z, Hu Q, Ma L: **GSK3/shaggy-like kinase 1**  
605 **ubiquitously regulates cell growth from Arabidopsis to Moso bamboo**  
606 **(Phyllostachys edulis)**. *Plant Sci* 2019, **283**:290-300.
- 607 2. Wang T, Wang H, Cai D, Gao Y, Zhang H, Wang Y, Lin C, Ma L, Gu L:  
608 **Comprehensive profiling of rhizome-associated alternative splicing and**  
609 **alternative polyadenylation in moso bamboo (Phyllostachys edulis)**. *Plant J* 2017,  
610 **91**:684-699.
- 611 3. Lowry JA, Atchley WR: **Molecular evolution of the GATA family of transcription**  
612 **factors: conservation within the DNA-binding domain**. *J Mol Evol* 2000,  
613 **50**:103-115.
- 614 4. Scazzocchio C: **The fungal GATA factors**. *Curr Opin Microbiol* 2000, **3**:126-131.
- 615 5. Katsumura KR, Bresnick EH, Group GFM: **The GATA factor revolution in**  
616 **hematology**. *Blood* 2017, **129**:2092-2102.
- 617 6. Patient RK, McGhee JD: **The GATA family (vertebrates and invertebrates)**. *Curr*  
618 *Opin Genet Dev* 2002, **12**:416-422.
- 619 7. Crispino JD, Horwitz MS: **GATA factor mutations in hematologic disease**. *Blood*  
620 2017, **129**:2103-2110.
- 621 8. Teakle GR, Gilmartin PM: **Two forms of type IV zinc-finger motif and their**

- 
- 622            **kingdom-specific distribution between the flora, fauna and fungi.** *Trends*  
623            *Biochem Sci* 1998, **23**:100-102.
- 624    9.        Reyes JC, Muro-Pastor MI, Florencio FJ: **The GATA family of transcription factors**  
625            **in Arabidopsis and rice.** *Plant Physiol* 2004, **134**:1718-1732.
- 626    10.        Zhang C, Hou Y, Hao Q, Chen H, Chen L, Yuan S, Shan Z, Zhang X, Yang Z, Qiu D *et*  
627            *al*: **Genome-wide survey of the soybean GATA transcription factor gene family**  
628            **and expression analysis under low nitrogen stress.** *PLoS One* 2015,  
629            **10**:e0125174.
- 630    11.        Zhang Z, Ren C, Zou L, Wang Y, Li S, Liang Z: **Characterization of the GATA gene**  
631            **family in Vitis vinifera: genome-wide analysis, expression profiles, and**  
632            **involvement in light and phytohormone response.** *Genome* 2018, **61**:713-723.
- 633    12.        Tremblay M, Sanchez-Ferras O, Bouchard M: **GATA transcription factors in**  
634            **development and disease.** *Development* 2018, **145**:dev164384.
- 635    13.        Terzaghi WB, Cashmore AR: **Light-regulated transcription.** *Annual Review of Plant*  
636            *Physiology and Plant Molecular Biology* 1995, **46**:445-474.
- 637    14.        Daniel-Vedele F, Caboche M: **A tobacco cDNA clone encoding a GATA-1 zinc**  
638            **finger protein homologous to regulators of nitrogen metabolism in fungi.** *Mol*  
639            *Gen Genet* 1993, **240**:365-373.
- 640    15.        Chen H, Shao H, Li K, Zhang D, Fan S, Li Y, Han M: **Genome-wide identification,**  
641            **evolution, and expression analysis of GATA transcription factors in apple**  
642            **(Malus domestica Borkh.).** *Gene* 2017, **627**:460-472.
- 643    16.        Hudson D, Guevara DR, Hand AJ, Xu Z, Hao L, Chen X, Zhu T, Bi Y-M, Rothstein SJ:  
644            **Rice cytokinin GATA transcription Factor1 regulates chloroplast development**  
645            **and plant architecture.** *Plant Physiol* 2013, **162**:132-144.
- 646    17.        Richter R, Bastakis E, Schwechheimer C: **Cross-repressive interactions between**  
647            **SOC1 and the GATAs GNC and GNL/CGA1 in the control of greening, cold**  
648            **tolerance, and flowering time in Arabidopsis.** *Plant Physiol* 2013, **162**:1992-2004.
- 649    18.        Shikata M, Matsuda Y, Ando K, Nishii A, Takemura M, Yokota A, Kohchi T:  
650            **Characterization of Arabidopsis ZIM, a member of a novel plant-specific GATA**  
651            **factor gene family.** *J Exp Bot* 2004, **55**:631-639.
- 652    19.        Liu P-P, Koizuka N, Martin RC, Nonogaki H: **The BME3 (Blue Micropylar End 3)**  
653            **GATA zinc finger transcription factor is a positive regulator of Arabidopsis seed**  
654            **germination.** *Plant Journal* 2005, **44**:960-971.



- 
- 655 20. Fu YH, Marzluf GA: **nit-2, the major nitrogen regulatory gene of *Neurospora***  
656 ***crassa*, encodes a protein with a putative zinc finger DNA-binding domain.** *Mol*  
657 *Cell Biol* 1990, **10**:1056-1065.
- 658 21. Richter R, Behringer C, Müller IK, Schwechheimer C: **The GATA-type transcription**  
659 **factors GNC and GNL/CGA1 repress gibberellin signaling downstream from**  
660 **DELLA proteins and PHYTOCHROME-INTERACTING FACTORS.** *Genes Dev* 2010,  
661 **24**:2093-2104.
- 662 22. Luo X-M, Lin W-H, Zhu S, Zhu J-Y, Sun Y, Fan X-Y, Cheng M, Hao Y, Oh E, Tian M *et*  
663 *al*: **Integration of light- and brassinosteroid-signaling pathways by a GATA**  
664 **transcription factor in *Arabidopsis*.** *Dev Cell* 2010, **19**:872-883.
- 665 23. Richter R, Behringer C, Zourelidou M, Schwechheimer C: **Convergence of auxin and**  
666 **gibberellin signaling on the regulation of the GATA transcription factors GNC**  
667 **and GNL in *Arabidopsis thaliana*.** *Proc Natl Acad Sci U S A* 2013, **110**:13192-13197.
- 668 24. Buzby JS, Yamada T, Tobin EM: **A light-regulated DNA-binding activity interacts**  
669 **with a conserved region of a *Lemna gibba* rbcS promoter.** *Plant Cell* 1990,  
670 **2**:805-814.
- 671 25. Carre IA, Kay SA: **Multiple DNA-Protein Complexes at a Circadian-Regulated**  
672 **Promoter Element.** *Plant Cell* 1995, **7**:2039-2051.
- 673 26. Naito T, Kiba T, Koizumi N, Yamashino T, Mizuno T: **Characterization of a unique**  
674 **GATA family gene that responds to both light and cytokinin in *Arabidopsis***  
675 ***thaliana*.** *Biosci Biotechnol Biochem* 2007, **71**:1557-1560.
- 676 27. Li L, Cheng Z, Ma Y, Bai Q, Li X, Cao Z, Wu Z, Gao J: **The association of hormone**  
677 **signalling genes, transcription and changes in shoot anatomy during moso**  
678 **bamboo growth.** *Plant Biotechnol J* 2018, **16**:72-85.
- 679 28. Zhang H, Wang H, Zhu Q, Gao Y, Wang H, Zhao L, Wang Y, Xi F, Wang W, Yang Y *et*  
680 *al*: **Transcriptome characterization of moso bamboo (*Phyllostachys edulis*)**  
681 **seedlings in response to exogenous gibberellin applications.** *BMC Plant Biol*  
682 2018, **18**:125-125.
- 683 29. Zhao H, Lou Y, Sun H, Li L, Wang L, Dong L, Gao Z: **Transcriptome and**  
684 **comparative gene expression analysis of *Phyllostachys edulis* in response to**  
685 **high light.** *BMC Plant Biol* 2016, **16**:34-34.
- 686 30. Liu H-L, Wu M, Li F, Gao Y-M, Chen F, Xiang Y: **TCP Transcription Factors in Moso**  
687 **Bamboo (*Phyllostachys edulis*): Genome-Wide Identification and Expression**

- 
- 688            **Analysis.** *Front Plant Sci* 2018, **9**:1263-1263.
- 689    31.    Cheng X, Xiong R, Yan H, Gao Y, Liu H, Wu M, Xiang Y: **The trihelix family of**  
690            **transcription factors: functional and evolutionary analysis in Moso bamboo**  
691            **(Phyllostachys edulis).** *BMC Plant Biol* 2019, **19**:154-154.
- 692    32.    Hou D, Cheng Z, Xie L, Li X, Li J, Mu S, Gao J: **The R2R3MYB Gene Family in**  
693            **Phyllostachys edulis: Genome-Wide Analysis and Identification of Stress or**  
694            **Development-Related R2R3MYBs.** *Front Plant Sci* 2018, **9**:738.
- 695    33.    Peng Z, Li L, Zhao Q, Feng Q, Gao Z, Lu H, Hu T, Yao N, Liu K, Li Y *et al*: **The draft**  
696            **genome of the fast-growing non-timber forest species moso bamboo**  
697            **(Phyllostachys heterocycla).** *Nat Genet* 2013, **45**:456-461.
- 698    34.    Jeong MJ, Shih MC: **Interaction of a GATA factor with cis-acting elements**  
699            **involved in light regulation of nuclear genes encoding chloroplast**  
700            **glyceraldehyde-3-phosphate dehydrogenase in Arabidopsis.** *Biochem Biophys*  
701            *Res Commun* 2003, **300**:555-562.
- 702    35.    Chiang Y-H, Zubo YO, Tapken W, Kim HJ, Lavanway AM, Howard L, Pilon M, Kieber  
703            JJ, Schaller GE: **Functional characterization of the GATA transcription factors**  
704            **GNC and CGA1 reveals their key role in chloroplast development, growth, and**  
705            **division in Arabidopsis.** *Plant Physiol* 2012, **160**:332-348.
- 706    36.    Kobayashi K, Obayashi T, Masuda T: **Role of the G-box element in regulation of**  
707            **chlorophyll biosynthesis in Arabidopsis roots.** *Plant Signal Behav* 2012,  
708            **7**:922-926.
- 709    37.    Yang X, Yang Y-N, Xue L-J, Zou M-J, Liu J-Y, Chen F, Xue H-W: **Rice ABI5-Like1**  
710            **regulates abscisic acid and auxin responses by affecting the expression of**  
711            **ABRE-containing genes.** *Plant Physiol* 2011, **156**:1397-1409.
- 712    38.    Ito M, Iwase M, Kodama H, Lavisse P, Komamine A, Nishihama R, Machida Y,  
713            Watanabe A: **A novel cis-acting element in promoters of plant B-type cyclin**  
714            **genes activates M phase-specific transcription.** *Plant Cell* 1998, **10**:331-341.
- 715    39.    Song X, Peng C, Zhou G, Gu H, Li Q, Zhang C: **Dynamic allocation and transfer of**  
716            **non-structural carbohydrates, a possible mechanism for the explosive growth**  
717            **of Moso bamboo (Phyllostachys heterocycla).** *Sci Rep* 2016, **6**:srep25908.
- 718    40.    Wang W, Gu L, Ye S, Zhang H, Cai C, Xiang M, Gao Y, Wang Q, Lin C, Zhu Q:  
719            **Genome-wide analysis and transcriptomic profiling of the auxin biosynthesis,**  
720            **transport and signaling family genes in moso bamboo (Phyllostachys**

- 
- 721            **heterocycla)**. *BMC Genomics* 2017, **18**:870-870.
- 722    41.    Sun H, Wang S, Lou Y, Zhu C, Zhao H, Li Y, Li X, Gao Z: **Whole-Genome and**  
723            **Expression Analyses of Bamboo Aquaporin Genes Reveal Their Functions**  
724            **Involved in Maintaining Diurnal Water Balance in Bamboo Shoots.** *Cells* 2018,  
725            7:pii: E195.
- 726    42.    Jiang K, Yung V, Chiba T, Feldman LJ: **Longitudinal patterning in roots: a**  
727            **GATA2-auxin interaction underlies and maintains the root transition domain.**  
728            *Planta* 2018, **247**:831-843.
- 729    43.    Kollmer I, Werner T, Schmulling T: **Ectopic expression of different**  
730            **cytokinin-regulated transcription factor genes of Arabidopsis thaliana alters**  
731            **plant growth and development.** *J Plant Physiol* 2011, **168**:1320-1327.
- 732    44.    Zhang X, Zhou Y, Ding L, Wu Z, Liu R, Meyerowitz EM: **Transcription repressor**  
733            **HANABA TARANU controls flower development by integrating the actions of**  
734            **multiple hormones, floral organ specification genes, and GATA3 family genes in**  
735            **Arabidopsis.** *Plant Cell* 2013, **25**:83-101.
- 736    45.    Ravindran P, Verma V, Stamm P, Kumar PP: **A Novel RGL2-DOF6 Complex**  
737            **Contributes to Primary Seed Dormancy in Arabidopsis thaliana by Regulating a**  
738            **GATA Transcription Factor.** *Mol Plant* 2017, **10**:1307-1320.
- 739    46.    Finn RD, Tate J, Mistry J, Coghill PC, Sammut SJ, Hotz H-R, Ceric G, Forslund K,  
740            Eddy SR, Sonnhammer ELL *et al*: **The Pfam protein families database.** *Nucleic*  
741            *Acids Res* 2008, **36**:D281-D288.
- 742    47.    Thompson JD, Gibson TJ, Plewniak F, Jeanmougin F, Higgins DG: **The CLUSTAL\_X**  
743            **windows interface: flexible strategies for multiple sequence alignment aided by**  
744            **quality analysis tools.** *Nucleic Acids Res* 1997, **25**:4876-4882.
- 745    48.    Kumar S, Stecher G, Tamura K: **MEGA7: Molecular Evolutionary Genetics**  
746            **Analysis Version 7.0 for Bigger Datasets.** *Mol Biol Evol* 2016, **33**:1870-1874.
- 747    49.    Marchler-Bauer A, Bo Y, Han L, He J, Lanczycki CJ, Lu S, Chitsaz F, Derbyshire MK,  
748            Geer RC, Gonzales NR *et al*: **CDD/SPARCLE: functional classification of proteins**  
749            **via subfamily domain architectures.** *Nucleic Acids Res* 2017, **45**:D200-D203.
- 750    50.    Bailey TL, Williams N, Misleh C, Li WW: **MEME: discovering and analyzing DNA**  
751            **and protein sequence motifs.** *Nucleic Acids Res* 2006, **34**:W369-W373.
- 752    51.    Lescot M, Déhais P, Thijs G, Marchal K, Moreau Y, Van de Peer Y, Rouzé P, Rombauts  
753            S: **PlantCARE, a database of plant cis-acting regulatory elements and a portal to**

754            **tools for in silico analysis of promoter sequences.** *Nucleic Acids Res* 2002,  
755            **30:325-327.**

756    52.    Trapnell C, Roberts A, Goff L, Pertea G, Kim D, Kelley D, Pimentel H, Salzberg S, Rinn  
757            J, Pachter L: **Differential gene and transcript expression analysis of RNA-seq**  
758            **experiments with TopHat and Cufflinks.** *Nat Protoc* 2012, **7:562-578.**

759

Fig.1

|          |                                                                                                                               |    |
|----------|-------------------------------------------------------------------------------------------------------------------------------|----|
| PeGATA21 | RFCSHC <del>GVQK</del> ..TFCWRAG <del>HEGAKTLCNAC</del> SVRYKSGRLLPEYRPAC <del>SPTFVNALHS</del> .....                         | 55 |
| PeGATA25 | RFCSHC <del>GVQK</del> ..TFCWRAG <del>HEGAKTLCNAC</del> SVRYKSGRLLPEYRPAC <del>SPTYVSALHS</del> .....                         | 55 |
| PeGATA1  | ..SHCGVQK..TFCWRAG <del>HEGAKTLCNAC</del> SVRYKSGRLLPEYRPAC <del>SPTFVGSIHNSH</del> ..                                        | 55 |
| PeGATA9  | RFCTHCASEK..TFCWR <del>TGHLGPKTLCNAC</del> SVRFKSGR <del>LMPEYRPAASPTFVLTQHS</del> .....                                      | 55 |
| PeGATA19 | RFCTHCASEK..TFCWR <del>TGHLGAKTLCNAC</del> SVRFKSGR <del>LMPEYRPAASPTFVLTQHS</del> .....                                      | 55 |
| PeGATA2  | RFCTHCQIEK..TFCWRAG <del>HLPKTL</del> CNACSVRYKSGR <del>LFPEYRPAASPTFVPSIHS</del> .....                                       | 55 |
| PeGATA5  | RFCTHC <del>AVEE</del> ..TFCWR <del>LGFDGPR</del> TLCNACSVRFKSGR <del>LFPEYRPANSPTFSPLLHS</del> .....                         | 55 |
| PeGATA6  | KRCTHCMSYK..TFCWRAG <del>HLPKTL</del> CNACSVRFKSGR <del>LLPEYRPANSPTFVSYMHS</del> .....                                       | 55 |
| PeGATA11 | KRCTHCMSYK..TFCWRAG <del>HLPKTL</del> CNACSVRFKSGR <del>LLPEYRPANSPTFVSYMHS</del> .....                                       | 55 |
| PeGATA31 | RFCLHCETDK..TFCWR <del>TGPMGPKTLCNAC</del> SVRYKSGR <del>LVQEYRPAASPTFMVSKHS</del> .....                                      | 55 |
| PeGATA10 | MFCLHCETDR..TFCWR <del>TGPMGPKTLCNAC</del> SVRYKSGR <del>LVPEYRPAASPTFMVSKHS</del> .....                                      | 55 |
| PeGATA30 | RFCLHCETDK..TFCWR <del>TGPMGPKTLCNDA</del> VQRV <del>RGA</del> VQVGAAGAGVPAVGE <del>PD</del> LR.....                          | 55 |
| PeGATA17 | RVCSDCN <del>TTK</del> ..TFLWR <del>SGPCGPKAAEGAA</del> DDGLRG.GAKVGT <del>PSDAATAHPKVKKE</del> ....                          | 55 |
| PeGATA26 | RVCSDCN <del>TTK</del> ..TFLWR <del>SGPRGPKSLCNAC</del> SIRQRKA.RRAMMAS.GASTEGAKVGT <del>PS</del> ...                         | 55 |
| PeGATA18 | RVCSDCN <del>TTK</del> ..TFLWR <del>SGPCGPKVLLSR</del> HPLSLIF.MCSMCNFASYR <del>VLQVVT</del> LIP....                          | 55 |
| PeGATA24 | RVCLDCN <del>TTK</del> ..TFLWR <del>SGPCGPKSLCNAC</del> SIRQRKA.RRAMAAV <del>TAAAANGGAAGVG</del> ....                         | 55 |
| PeGATA28 | RS <del>CV</del> ECRTTT..TFMWR <del>GGGTGPR</del> SLCNAC <del>SIRYRKK</del> .RRQELGQDQKQ <del>P.QQHR</del> GEAT...            | 55 |
| PeGATA29 | TS <del>CV</del> ECGTTT..TFMWR <del>GGGT</del> RPRSLCNAC <del>SIRYRKK</del> .RRQELGLDQKQ <del>.QQH</del> GEATT..              | 55 |
| PeGATA3  | KACTDCH <del>TTK</del> ..TFLWR <del>GGGSGPKSLCNAC</del> SIRYRKK.RREALGLDAGE <del>.GAEQQQ</del> KK..                           | 55 |
| PeGATA16 | KACTDCH <del>TTK</del> ..TFLWR <del>GGGSGPKSLCNAC</del> SIRYRKK.RREALGLDAGE <del>.GAEQQQ</del> KK..                           | 55 |
| PeGATA7  | KACADCH <del>TTK</del> ..TFLWR <del>GGGTGPKSLCNAC</del> SIRYRKR.RRQALGLD <del>ATETEGAEQQQ</del> ....                          | 55 |
| PeGATA13 | KACADCH <del>TTK</del> ..TFLWR <del>GGGTGPKSLCNAC</del> SIRYRKR.RRQALGLEAAA <del>.EGAEQQQ</del> ....                          | 55 |
| PeGATA27 | RF <del>CAN</del> CGTTS..TFLWR <del>NGRGP</del> KSLCNAC <del>SIRF</del> KEERRAAAAA <del>ESGGAWCGYSAQ</del> .....              | 55 |
| PeGATA8  | RF <del>CAN</del> CDTTS..TFLWR <del>NGRGP</del> KSLCNAC <del>SIRY</del> KEERRAAAAA <del>VAPPP.PQDS</del> GVGY...              | 55 |
| PeGATA12 | NACAN <del>CDTTS</del> ..TFLWR <del>NGRGP</del> KSLCNAC <del>SIRY</del> KEERRAAAAA <del>VAPTALPS</del> DSGV.....              | 55 |
| PeGATA22 | IF <del>CQ</del> NCGTSEKMTFAMRR <del>GFAGPR</del> TLCNACGLMWANKGT...LRSCPKANVEAP <del>LVTI</del> ...                          | 55 |
| PeGATA23 | LF <del>CQ</del> NCGTSEKMTFAMRR <del>GFAGPR</del> TLCNACGLMWANK <del>FLPYYFLWAWRKL</del> FVDEQ.....                           | 55 |
| PeGATA4  | SE <del>CH</del> HCGASATQTFMRR <del>GFAGPR</del> TLCNACGLMWANK <del>ILVLEATS</del> RCHHCGASAT.....                            | 55 |
| PeGATA15 | SE <del>CH</del> HCGISATLTFMRR <del>GFAGPR</del> M <del>LCNAC</del> GLMWANK <del>GMMRDLS</del> .KAPTAP <del>LRVVP</del> ..... | 55 |
| PeGATA14 | .....THSRLTFAMRR <del>GFAGPR</del> SLCNAC <del>GLK</del> WANKGTLRS.PLNAPK <del>VTVQHPTNLSKMC</del>                            | 54 |
| PeGATA20 | TF <del>CQ</del> NCGISSRLTFAMRR <del>GFAGPR</del> SLCNACGLMWANKGTLRS.PLNAPK <del>MTLQHPA</del> .....                          | 55 |

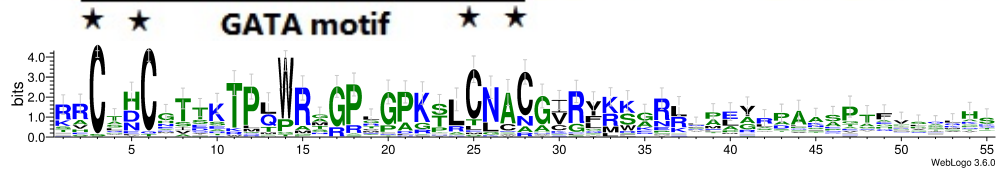

Fig.2

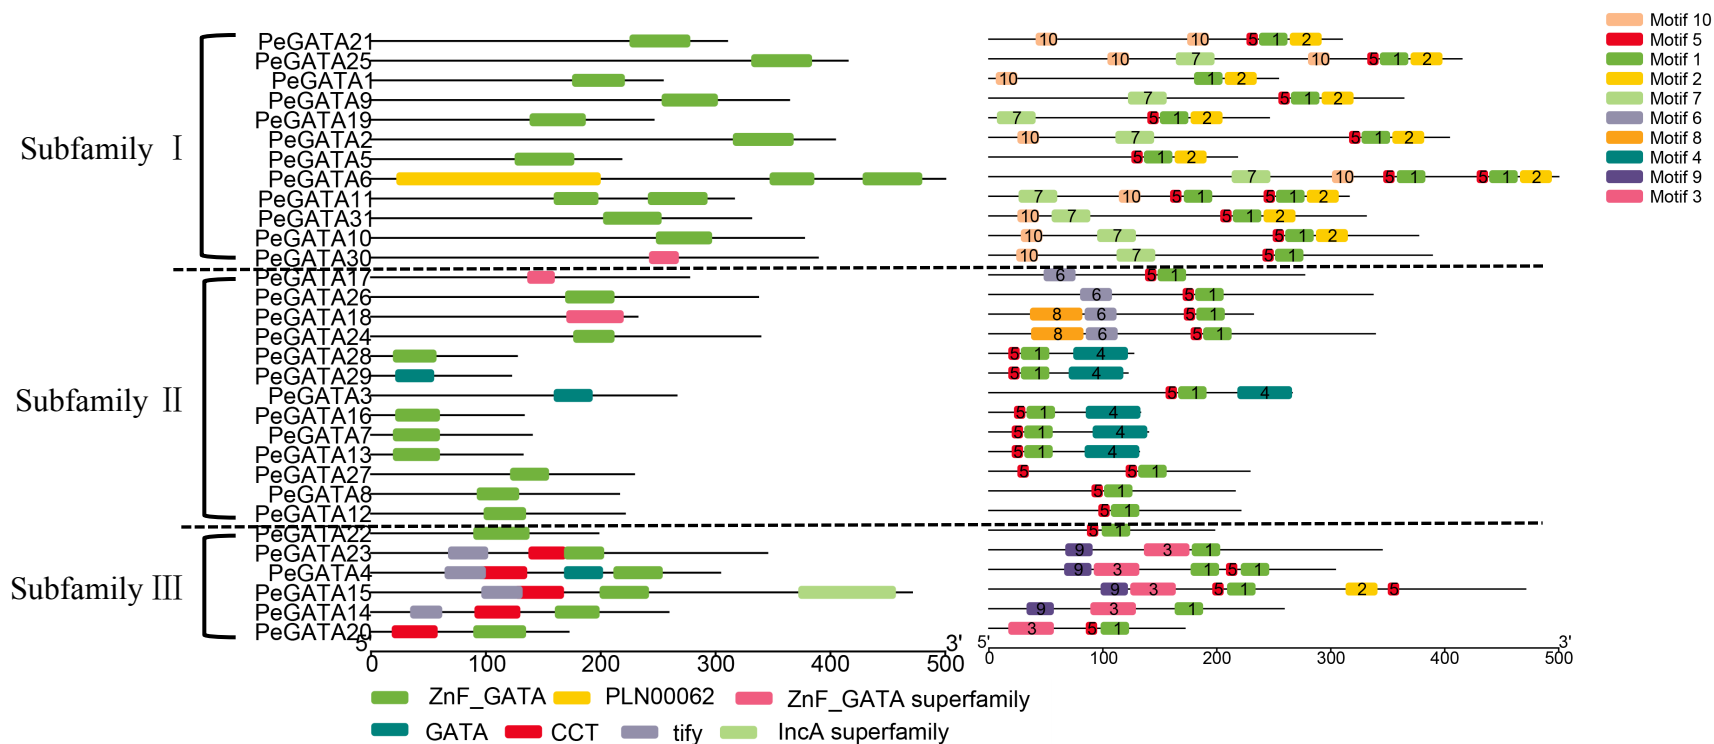

Fig.3

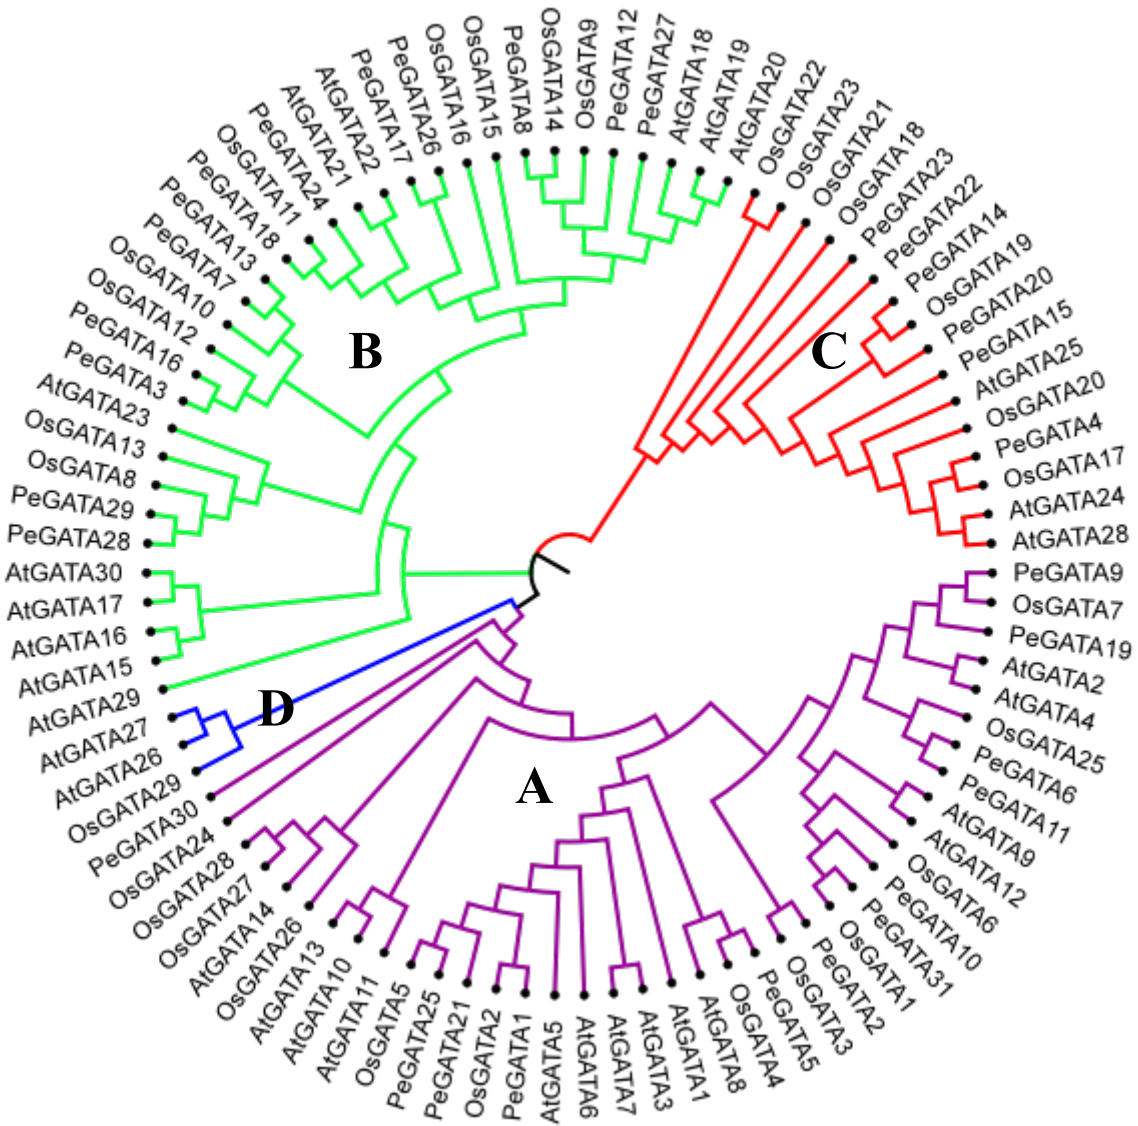

Fig.4

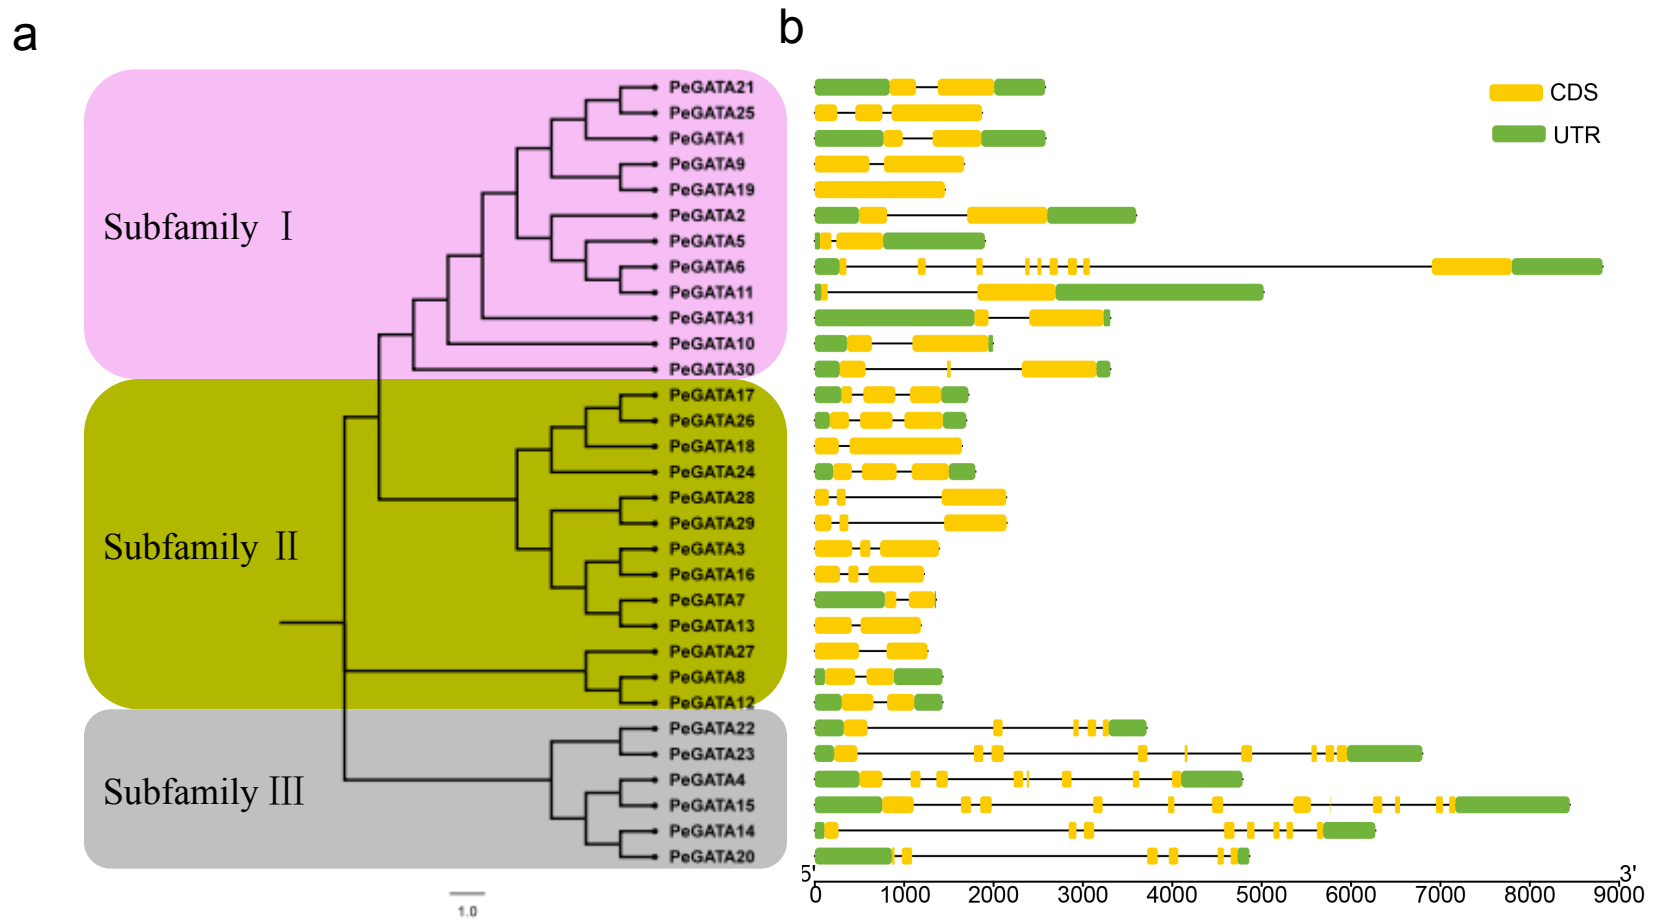





Fig.6

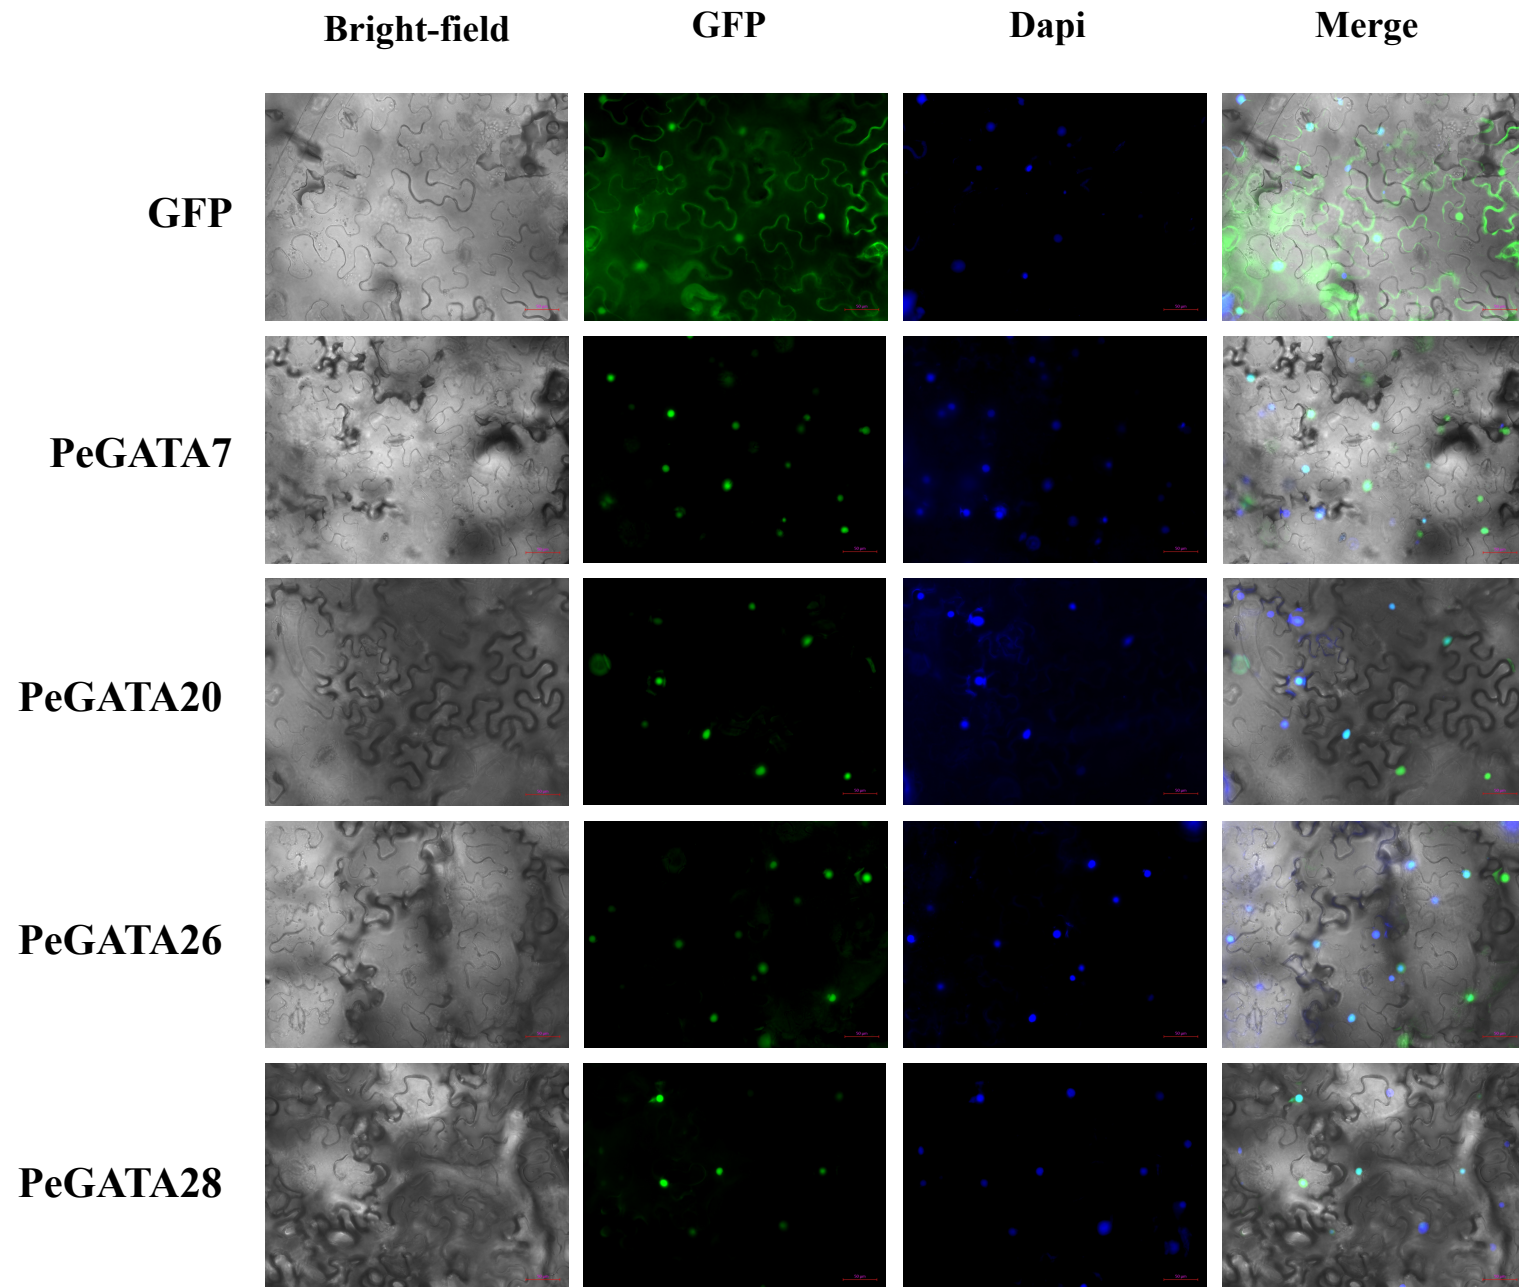

Fig.7

a

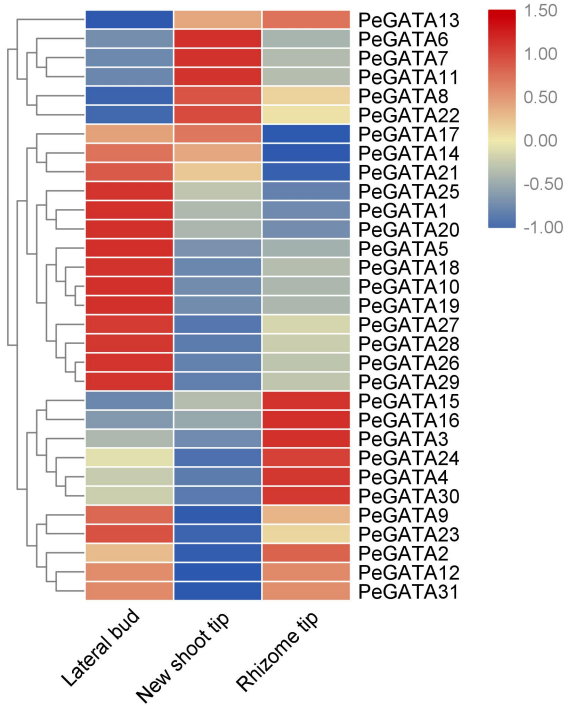

b

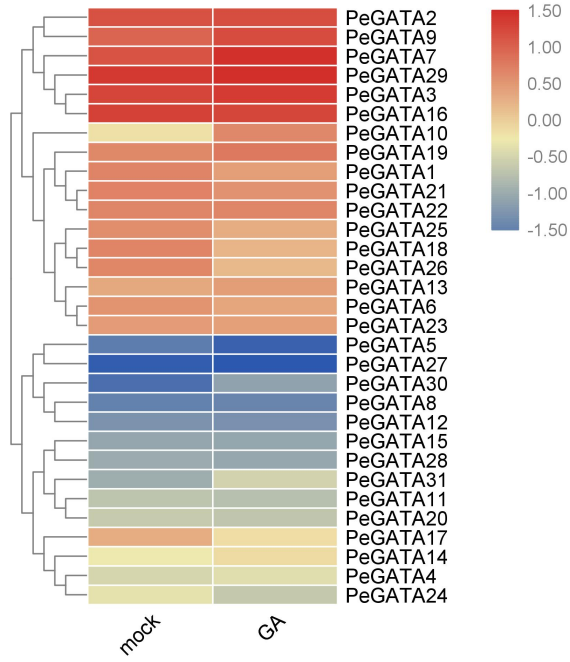

c

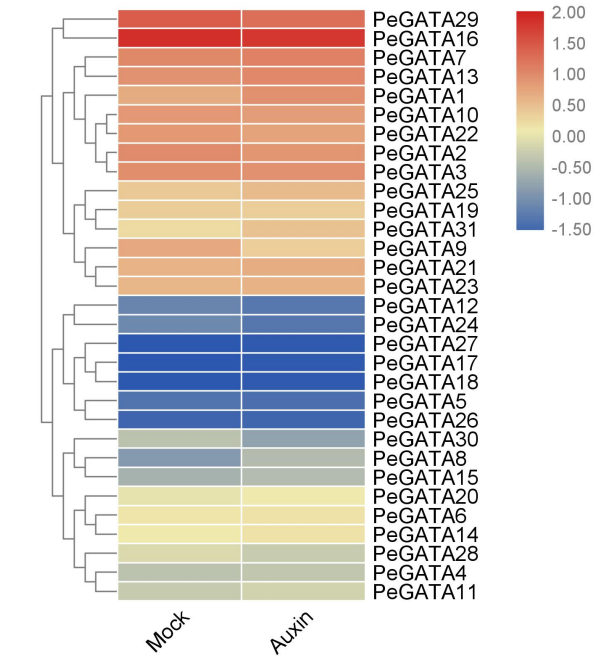

**Fig.8**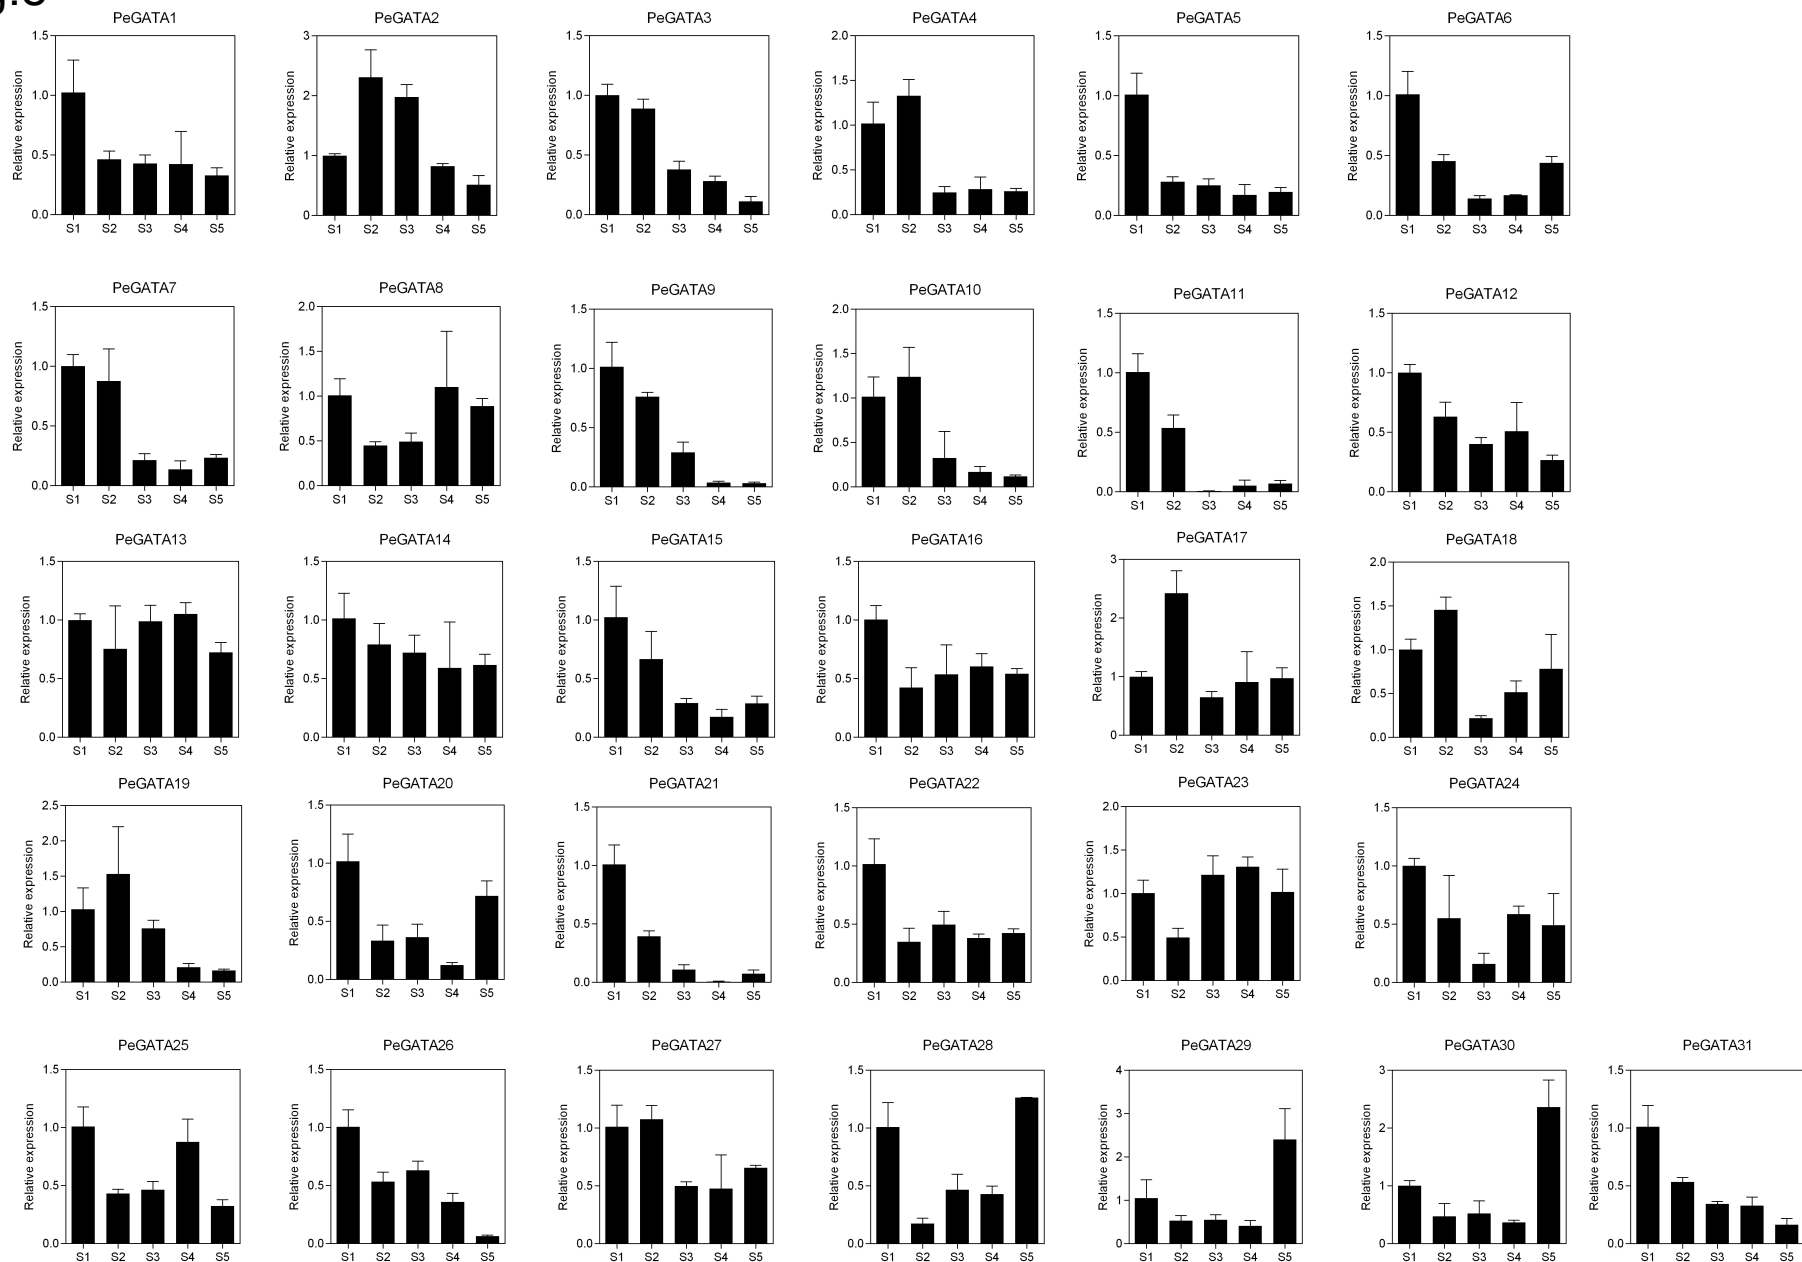

Fig.9

a

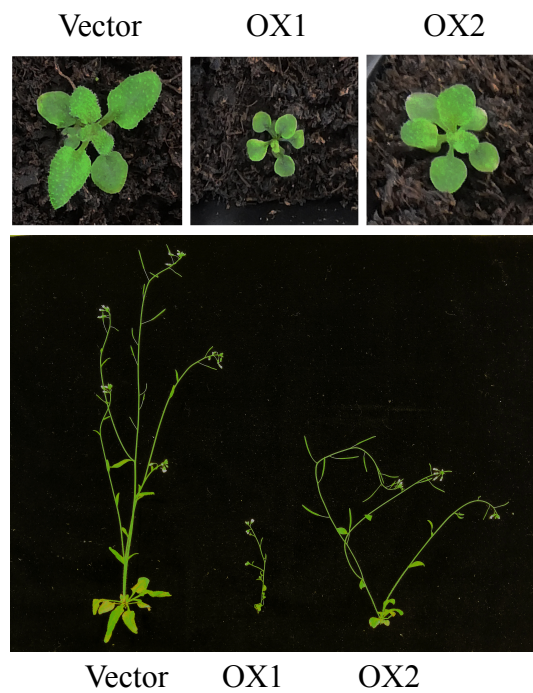

b

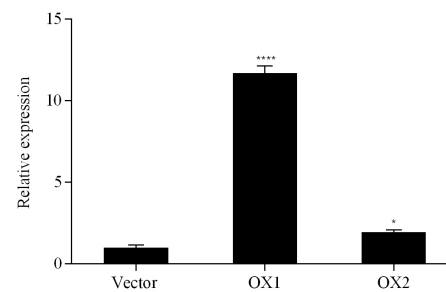

c

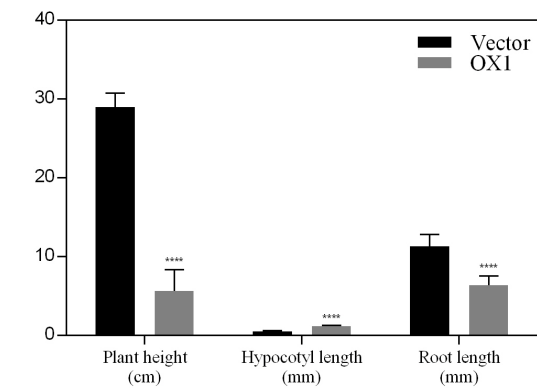

d

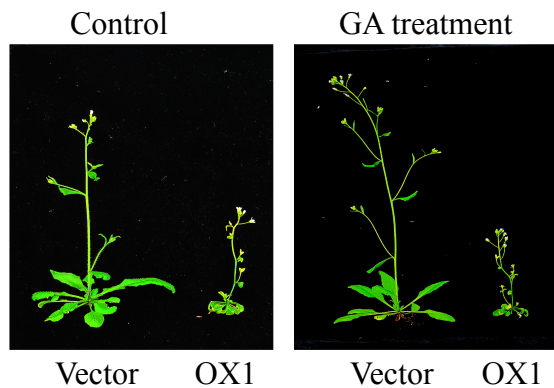

e

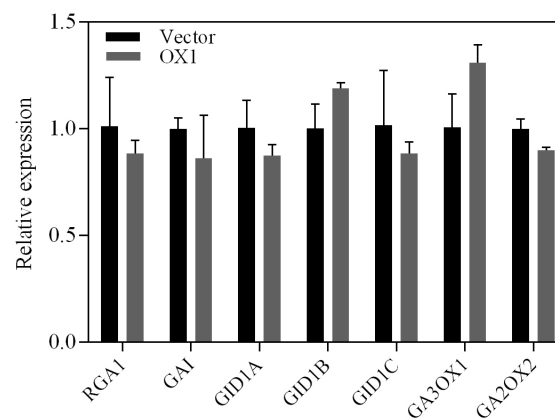

Source: https://www.biorxiv.org/content/10.1101/744003v1.full.pdf
